# Supplementary material for: Multielemental, Nutritional, and Proteomic Characterization of Different Lupinus spp. Genotypes: A Source of Nutrients for Dietary Use
Source: MDPI journal article supplement (doi:10.3390/molecules27248771), 2022-12-10
Supplement: s1 [file s1]

**Table S1.** List of the identified protein spots in Luxor cultivar of *Lupinus albus*. Spots are referred to **Figure 3A**.

| Spot        | Protein [Organism]                                       | Accession Number | Coverage % | Exp Mr | Theor Mr/pI | MASCOT score | Sequence region (amino acid position)    |
|-------------|----------------------------------------------------------|------------------|------------|--------|-------------|--------------|------------------------------------------|
| 124         | Conglutin $\beta$ [ <i>Lupinus albus</i> ]               | Q6EBC1           | 32         | 40     | 54.3/6.27   | 1119         | Central (111-339)                        |
| 125         | Vicilin-like protein [ <i>Lupinus albus</i> ]            | Q53HY0           | 27         | 35     | 62.0/6.08   | 1279         | Central (143-315)                        |
| 126         | NI                                                       |                  |            | 83     |             |              |                                          |
| 127         | NI                                                       |                  |            | 83     |             |              |                                          |
| 136         | Vicilin-like protein (Fragment) [ <i>Lupinus albus</i> ] | Q53HY0           | 19         | 70     | 62.0/6.08   | 504          | Central (154-464)                        |
| 141/161     | Vicilin-like protein (Fragment) [ <i>Lupinus albus</i> ] | Q53HY0           | 56         | 19     | 62.0/6.08   | 1966         |                                          |
| 142/167/160 | Conglutin $\beta$ precursor [ <i>Lupinus albus</i> ]     | Q6EBC1           | 26         | 69.5   | 62.1/6.43   | 1112         | Central (97-384)                         |
| 145         | Conglutin $\beta$ [ <i>Lupinus albus</i> ]               | Q6EBC1           | 36         | 60     | 62.1/6.43   | 878          | Central (64-495)                         |
| 148         | Conglutin $\beta$ [ <i>Lupinus albus</i> ]               | Q6EBC1           | 52         | 60     | 62.1/6.43   | 1606         | Central (60-495)                         |
| 149/163     | Conglutin $\beta$ [ <i>Lupinus albus</i> ]               | Q6EBC1           | 36         | 65     | 62.1/6.43   | 878          | Central (64-495)                         |
| 154         | Conglutin $\beta$ precursor [ <i>Lupinus albus</i> ]     | Q6EBC1           | 46         | 68.5   | 62.1/6.43   | 2408         | Central and C-Terminal (143-289/427-495) |
| 155         | Vicilin-like protein (Fragment) [ <i>Lupinus albus</i> ] | Q53HY0           | 64         | 60     | 62.0/6.08   | 2201         | Central and C-terminal (60-521)          |
| 158/147     | Vicilin-like protein (Fragment) [ <i>Lupinus albus</i> ] | Q53HY0           | 61         | 52     | 62.0/6.08   | 1956         | Central and C-terminal (60-521)          |
| 178/173     | Vicilin-like protein (Fragment) [ <i>Lupinus albus</i> ] | Q53HY0           | 59         | 55     | 62.0/6.42   | 5474.75      |                                          |
| 183/194     | Vicilin-like protein (Fragment) [ <i>Lupinus albus</i> ] | Q6EBC1           | 35         | 50     | 62.0/6.42   | 1523.58      |                                          |
| 188/189/192 | Vicilin-like protein (Fragment) [ <i>Lupinus albus</i> ] | Q53HY0           | 58         | 50     | 62.0/6.08   | 1860         | Central and C-terminal (90-521)          |
| 201         | Conglutin $\beta$ [ <i>Lupinus albus</i> ]               | Q6EBC1           | 27         | 48     | 62.1/6.43   | 712          | Central (154-463)                        |
| 202         | Conglutin $\alpha$ 2 [ <i>Lupinus angustifolius</i> ]    | F5B8V7           | 45         | 48     | 74.6/5.12   | 3665         |                                          |

|         |                                                            |        |    |      |           |      |                                  |
|---------|------------------------------------------------------------|--------|----|------|-----------|------|----------------------------------|
| 202     | Conglutin $\beta$ [ <i>Lupinus albus</i> ]                 | Q6EBC1 | 18 | 49   | 62.1/6.43 | 386  | Central (169-404)                |
| 204/211 | Conglutin $\beta$ [ <i>Lupinus albus</i> ]                 | Q6EBC1 | 48 | 50   | 62.1/6.43 | 1643 | N-terminal and Central (45-408)  |
| 204/211 | Conglutin $\gamma$ [ <i>Lupinus albus</i> ]                | Q9FSH9 | 21 | 50   | 49.9/8.39 | 373  |                                  |
| 207/218 | Vicilin-like protein (Fragment) [ <i>Lupinus albus</i> ]   | Q53HY0 | 36 | 48   | 62.0/6.08 | 957  | Central and C-terminal (154-521) |
| 209     | Vicilin-like protein (Fragment) [ <i>Lupinus albus</i> ]   | Q53HY0 | 27 | 47   | 62.0/6.08 | 702  | Central (154-463)                |
| 214     | Conglutin $\beta$ precursor [ <i>Lupinus albus</i> ]       | Q6EBC1 | 24 | 44.5 | 62.1/6.43 | 1281 |                                  |
| 223     | Vicilin-like protein (Fragment) [ <i>Lupinus albus</i> ]   | Q53HY0 | 45 | 48   | 62.0/6.08 | 1604 | N-terminal and Central (45-408)  |
| 227     | Conglutin $\alpha$ 2 [ <i>Lupinus angustifolius</i> ]      | F5B8V7 | 6  | 42   | 74.6/5.12 | 268  | C-terminal (556-611)             |
| 229     | Putative quinone oxidoreductase [ <i>Cicer arietinum</i> ] | Q8L5Q7 | 22 | 20   | 21.7/6.51 | 245  | Central (53-191)                 |
| 231     | Vicilin-like protein [ <i>Lupinus albus</i> ]              | Q53HY0 | 24 | 40.5 | 62/6.08   | 1424 | Central (143-315)                |
| 233     | Legumin-like protein [ <i>Lupinus albus</i> ]              | Q53I54 | 23 | 43   | 59.0/5.53 | 526  | N-terminal and Central (29-253)  |
| 233     | Vicilin-like protein (Fragment) [ <i>Lupinus albus</i> ]   | Q53HY0 | 17 | 43   | 62.0/6.08 | 475  | Central (154-463)                |
| 235/254 | Legumin-like protein [ <i>Lupinus albus</i> ]              | Q53I54 | 49 | 20   | 59.0/5.53 | 1150 | N-terminal and Central (29-485)  |
| 238/265 | Vicilin-like protein (Fragment) [ <i>Lupinus albus</i> ]   | Q53HY0 | 31 | 43   | 62.0/6.08 | 771  | Central (146-463)                |
| 240     | Vicilin-like protein (Fragment) [ <i>Lupinus albus</i> ]   | Q53HY0 | 19 | 41   | 62.0/6.08 | 525  | Central (146-289)                |
| 245     | Vicilin-like protein (Fragment) [ <i>Lupinus albus</i> ]   | Q53HY0 | 43 | 40   | 61.9/6.08 | 1549 | Central (60-404)                 |
| 248     | Vicilin-like protein (Fragment) [ <i>Lupinus albus</i> ]   | Q53HY0 | 41 | 40   | 61.9/6.08 | 1226 | Central (60-397)                 |
| 256     | Legumin-like protein [ <i>Lupinus albus</i> ]              | Q53I54 | 47 | 38   | 59.0/5.53 | 2547 | N-terminal and Central (29-485)  |
| 257/260 | Vicilin-like protein (Fragment) [ <i>Lupinus albus</i> ]   | Q53HY0 | 52 | 38   | 62.0/6.08 | 1985 | N-terminal and Central (45-404)  |
| 257/260 | Conglutin $\gamma$ [ <i>Lupinus albus</i> ]                | Q9FSH9 | 17 | 38   | 49.9/8.39 | 296  |                                  |
| 261     | Conglutin $\beta$ [ <i>Lupinus albus</i> ]                 | Q6EBC1 | 50 | 38   | 62.1/6.43 | 2070 | Central (63-408)                 |

|             |                                                                  |        |    |    |           |      |                                  |
|-------------|------------------------------------------------------------------|--------|----|----|-----------|------|----------------------------------|
| 261         | Conglutin $\gamma$ [ <i>Lupinus albus</i> ]                      | Q9FSH9 | 21 | 38 | 49.9/8.39 | 396  |                                  |
| 262         | Vicilin-like protein (Fragment) [ <i>Lupinus albus</i> ]         | Q53HY0 | 51 | 44 | 62.0/6.08 | 2016 | Central (60-408)                 |
| 262         | Conglutin $\gamma$ [ <i>Lupinus albus</i> ]                      | Q9FSH9 | 14 | 44 | 49.9/8.39 | 276  |                                  |
| 263         | Vicilin-like protein (Fragment) [ <i>Lupinus albus</i> ]         | Q53HY0 | 36 | 45 | 61.9/6.08 | 1060 | Central (64-335)                 |
| 267/285/258 | Vicilin-like protein (Fragment) [ <i>Lupinus albus</i> ]         | Q53HY0 | 37 | 35 | 62.0/6.08 | 1048 | Central and C-terminal (75-139)  |
| 268/269     | Vicilin-like protein (Fragment) [ <i>Lupinus albus</i> ]         | Q53HY0 | 40 | 38 | 62.0/6.08 | 1640 | Central (90-404)                 |
| 273         | Vicilin-like protein [ <i>Lupinus albus</i> ]                    | Q53HY0 | 41 | 40 | 62.06.08  | 2293 | Central (94-397)                 |
| 274         | Vicilin-like protein (Fragment) [ <i>Lupinus albus</i> ]         | Q53HY0 | 40 | 37 | 62.0/6.08 | 1459 | Central (90-408)                 |
| 277         | Conglutin $\alpha$ 1 [ <i>Lupinus angustifolius</i> ]            | F5B8V6 | 47 | 31 | 58.1/5.26 | 2710 |                                  |
| 278         | Vicilin-like protein (Fragment) [ <i>Lupinus albus</i> ]         | Q53HY0 | 40 | 35 | 61.9/6.08 | 1435 | Central (90-404)                 |
| 284         | Conglutin $\beta$ [ <i>Lupinus albus</i> ]                       | Q6EBC1 | 36 | 32 | 62.1/6.43 | 951  | Central (154-495)                |
| 286         | Vicilin-like protein (Fragment) [ <i>Lupinus albus</i> ]         | Q53HY0 | 24 | 31 | 62.0/6.08 | 714  | Central (228-495)                |
| 288/295/306 | Vicilin-like protein (Fragment) [ <i>Lupinus albus</i> ]         | Q53HY0 | 41 | 32 | 62.0/6.08 | 1199 | Central (143-495)                |
| 294/293     | Vicilin-like protein (Fragment) [ <i>Lupinus albus</i> ]         | Q53HY0 | 45 | 33 | 62.0/6.08 | 1344 | Central (143-463)                |
| 294/293     | Conglutin $\gamma$ [ <i>Lupinus albus</i> ]                      | Q9FSH9 | 27 | 33 | 49.9/8.39 | 643  |                                  |
| 296         | Vicilin-like protein (Fragment) [ <i>Lupinus albus</i> ]         | Q53HY0 | 19 | 30 | 62.0/6.08 | 526  | Central (143-345)                |
| 296         | Conglutin $\delta$ Seed storage protein [ <i>Lupinus albus</i> ] | Q333K7 | 35 | 14 | 17.6/5.47 | 394  | Central and C-terminal (75-131)  |
| 296         | Conglutin $\gamma$ [ <i>Lupinus albus</i> ]                      | Q9FSH9 | 14 | 14 | 49.9/8.39 | 335  | Central and C-terminal (324-426) |
| 297         | Vicilin-like protein (Fragment) [ <i>Lupinus albus</i> ]         | Q53HY0 | 39 | 30 | 62.0/6.08 | 1101 | Central and C-terminal (206-521) |
| 302         | Conglutin $\beta$ 2 [ <i>Lupinus angustifolius</i> ]             | F5B8W0 | 23 | 30 | 70.7/5.64 | 376  |                                  |
| 303         | Vicilin-like protein (Fragment) [ <i>Lupinus albus</i> ]         | Q53HY0 | 43 | 30 | 62.0/6.08 | 1280 | Central and C-terminal (194-521) |

|     |                                                          |        |    |      |           |      |                                          |
|-----|----------------------------------------------------------|--------|----|------|-----------|------|------------------------------------------|
| 308 | Conglutin $\beta$ [ <i>Lupinus albus</i> ]               | Q6EBC1 | 38 | 30   | 62.1/6.43 | 1236 | N-terminal and Central (51-451)          |
| 308 | Conglutin $\gamma$ [ <i>Lupinus albus</i> ]              | Q9FSH9 | 11 | 30   | 49.9/8.39 | 288  | Central (51-251)                         |
| 309 | Vicilin-like protein (Fragment) [ <i>Lupinus albus</i> ] | Q53HY0 | 41 | 30   | 61.9/6.08 | 1348 |                                          |
| 309 | Conglutin $\gamma$ [ <i>Lupinus albus</i> ]              | Q9FSH9 | 22 | 30   | 49.9/8.39 | 1348 | Central and C-terminali (51-351/401-452) |
| 310 | Vicilin-like protein (Fragment) [ <i>Lupinus albus</i> ] | Q53HY0 | 36 | 30   | 61.9/6.08 | 1031 | Central and C-terminal (101-301/451-521) |
| 310 | Conglutin $\gamma$ [ <i>Lupinus albus</i> ]              | Q9FSH9 | 33 | 30   | 49.9/8.39 | 641  | Central and C-terminal (51-351/401-452)  |
| 311 | Vicilin-like protein [ <i>Lupinus albus</i> ]            | Q53HY0 | 26 | 30.5 | 62.0/6.08 | 732  |                                          |
| 313 | Conglutin $\beta$ 2 [ <i>Lupinus angustifolius</i> ]     | F5B8W0 | 31 | 27.5 | 70.7/5.64 | 1345 | Central and C-terminal (175-576)         |
| 314 | Conglutin $\beta$ precursor [ <i>Lupinus albus</i> ]     | Q6EBC1 | 7  | 27   | 62.1/6.43 | 305  | Central (154-289)                        |
| 315 | Conglutin $\beta$ [ <i>Lupinus albus</i> ]               | Q6EBC1 | 31 | 30   | 62.1/6.43 | 1014 | Central (101-451)                        |
| 315 | Conglutin $\gamma$ [ <i>Lupinus albus</i> ]              | Q9FSH9 | 9  | 30   | 49.9/8.39 | 201  | Central (51-251)                         |
| 317 | Vicilin-like protein (Fragment) [ <i>Lupinus albus</i> ] | Q53HY0 | 36 | 29   | 61.9/6.08 | 1123 | Central and C-terminal (101-301/451-531) |
| 317 | Conglutin $\gamma$ [ <i>Lupinus albus</i> ]              | Q9FSH9 | 16 | 29   | 49.9/8.39 | 341  | Central and C-terminal (51-251/401-452)  |
| 320 | Vicilin-like protein (Fragment) [ <i>Lupinus albus</i> ] | Q53HY0 | 57 | 26   | 62.0/6.08 | 1471 | Central and C-terminal (154-521)         |
| 322 | Conglutin $\beta$ [ <i>Lupinus albus</i> ]               | Q6EBC1 | 28 | 25   | 62.1/6.43 | 848  | Central (64-268)                         |
| 322 | Conglutin $\gamma$ [ <i>Lupinus albus</i> ]              | Q9FSH9 | 6  | 30   | 49.9/8.39 | 157  | Central (69-187)                         |
| 323 | Vicilin-like protein (Fragment) [ <i>Lupinus albus</i> ] | Q53HY0 | 6  | 21   | 62.0/6.08 | 118  |                                          |
| 324 | BLAD (Fragment) [ <i>Lupinus albus</i> ]                 | Q0R0N3 | 21 | 26   | 20.4/9.66 | 138  | Central (98-139)                         |
| 324 | Conglutin $\gamma$ [ <i>Lupinus albus</i> ]              | Q9FSH9 | 11 | 26   | 49.9/8.39 | 72   |                                          |
| 326 | Vicilin-like protein (Fragment) [ <i>Lupinus albus</i> ] | Q53HY0 | 22 | 29   | 61.9/6.08 | 856  | Central (101-451)                        |
| 326 | Conglutin $\gamma$ [ <i>Lupinus albus</i> ]              | Q9FSH9 | 6  | 29   | 49.9/8.39 | 86   | Central (51-151)                         |

|         |                                                                  |        |    |    |           |      |                                         |
|---------|------------------------------------------------------------------|--------|----|----|-----------|------|-----------------------------------------|
| 331     | Putative glutathione S-transferase [ <i>Morus notabilis</i> ]    | W9RU43 | 12 | 24 | 25.2/5.50 | 322  | N-terminal and Central (26-52)          |
| 332     | Vicilin-like protein (Fragment) [ <i>Lupinus albus</i> ]         | Q53HY0 | 28 | 25 | 61.9/6.08 | 765  | Central (64-495)                        |
| 334     | Conglutin $\beta$ precursor [ <i>Lupinus albus</i> ]             | Q6EBC1 | 27 | 20 | 62.1/6.43 | 1395 | Central and C-terminal (90-268/346-437) |
| 334     | Conglutin $\gamma$ [ <i>Lupinus albus</i> ]                      | Q9FSH9 | 6  | 20 | 49.9/8.39 | 153  | Central (69-187)                        |
| 336     | Conglutin $\beta$ [ <i>Lupinus albus</i> ]                       | Q6EBC1 | 26 | 20 | 62.1/6.43 | 924  | Central (90-268)                        |
| 337     | Conglutin $\beta$ [ <i>Lupinus albus</i> ]                       | Q6EBC1 | 12 | 20 | 62.1/6.43 | 221  | Central (154-404)                       |
| 338     | Legumin-like protein [ <i>Lupinus albus</i> ]                    | Q53I55 | 11 | 20 | 28.0/9.34 | 363  |                                         |
| 339     | NI                                                               |        |    | 20 |           |      |                                         |
| 341     | Legumin-like protein [ <i>Lupinus albus</i> ]                    | Q53I54 | 18 | 20 | 59.0/5.53 | 706  | Central (338-498)                       |
| 341     | Conglutin $\delta$ Seed storage protein [ <i>Lupinus albus</i> ] | Q333K7 | 20 | 20 | 17.6/5.47 | 273  | C-terminal (101-131)                    |
| 344     | Conglutin $\beta$ [ <i>Lupinus albus</i> ]                       | Q6EBC1 | 31 | 19 | 62.1/6.43 | 1383 | Central (80-289)                        |
| 344     | Conglutin $\gamma$ [ <i>Lupinus albus</i> ]                      | Q9FSH9 | 9  | 19 | 49.9/8.39 | 284  | Central (68-279)                        |
| 345     | Legumin-like protein [ <i>Lupinus albus</i> ]                    | Q53I55 | 11 | 19 | 28.0/9.34 | 391  |                                         |
| 346     | Legumin-like protein [ <i>Lupinus albus</i> ]                    | Q53I54 | 18 | 19 | 50.0/5.53 | 689  | Central (338-498)                       |
| 350     | Conglutin $\delta$ Seed storage protein [ <i>Lupinus albus</i> ] | Q333K7 | 41 | 17 | 17.6/5.47 | 450  | Central and C-terminal (75-139)         |
| 350     | Vicilin-like protein (Fragment) [ <i>Lupinus albus</i> ]         | Q53HY0 | 11 | 17 | 62.0/6.08 | 349  | Central (427-496)                       |
| 351     | Vicilin-like protein (Fragment) [ <i>Lupinus albus</i> ]         | Q53HY0 | 26 | 18 | 62.0/6.08 | 893  | Central (194-463)                       |
| 353     | Vicilin-like protein (Fragment) [ <i>Lupinus albus</i> ]         | Q53HY0 | 21 | 17 | 62.0/6.08 | 569  | Central and C-terminal (275-521)        |
| 354/352 | Conglutin $\beta$ [ <i>Lupinus albus</i> ]                       | Q6EBC1 | 15 | 18 | 62.1/6.43 | 421  | Central (274-496)                       |
| 355     | Conglutin $\delta$ Seed storage protein [ <i>Lupinus albus</i> ] | Q333K7 | 35 | 18 | 17.6/5.47 | 363  | Central and C-terminal (75-131)         |
| 356     | Conglutin $\beta$ [ <i>Lupinus albus</i> ]                       | Q6EBC1 | 16 | 16 | 62.1/6.43 | 569  | Central (324-495)                       |

|         |                                                                  |        |    |      |           |      |                                  |
|---------|------------------------------------------------------------------|--------|----|------|-----------|------|----------------------------------|
| 357     | HSP18.1A [ <i>Citrullus lanatus</i> ]                            | H6TB42 | 30 | 16   | 18.1/6.35 | 387  | Central (67-144)                 |
| 357     | Conglutin $\gamma$ [ <i>Lupinus albus</i> ]                      | Q9FSH9 | 14 | 16   | 49.9/8.39 | 322  | Central (324-427)                |
| 358     | Conglutin $\gamma$ [ <i>Lupinus albus</i> ]                      | Q9FSH9 | 15 | 15.7 | 49.9/8.39 | 322  |                                  |
| 359     | Conglutin $\alpha$ 2 [ <i>Lupinus angustifolius</i> ]            | F5B8V7 | 2  | 17   | 74.6/5.12 | 91   | C-terminal (598-611)             |
| 360     | Conglutin $\gamma$ [ <i>Lupinus albus</i> ]                      | Q9FSH9 | 6  | 18   | 49.9/8.39 | 146  | Central (69-187)                 |
| 361     | Conglutin $\beta$ [ <i>Lupinus albus</i> ]                       | Q6EBC1 | 20 | 18   | 62.1/6.43 | 686  | Central (316-495)                |
| 362     | 17.5 kd heat shock family protein [ <i>Populus trichocarpa</i> ] | B9IQG7 | 33 | 17   | 17.5/5.98 | 599  | Central (67-141)                 |
| 363/370 | Vicilin-like protein (Fragment) [ <i>Lupinus albus</i> ]         | Q53HY0 | 49 | 16   | 62.0/6.08 | 1213 | N-terminal and Central (45-495)  |
| 363/370 | Conglutin $\gamma$ [ <i>Lupinus albus</i> ]                      | Q9FSH9 | 30 | 16   | 49.9/8.39 | 702  | Central (68-426)                 |
| 364     | Vicilin-like protein (Fragment) [ <i>Lupinus albus</i> ]         | Q53HY0 | 19 | 17   | 62.0/6.08 | 674  |                                  |
| 364     | Conglutin $\delta$ Seed storage protein [ <i>Lupinus albus</i> ] | Q333K7 | 35 | 17   | 17.6/5.47 | 299  | Central and C-terminal (75-131)  |
| 368     | Seed storage protein [ <i>Lupinus angustifolius</i> ]            | F5B8V8 | 14 | 16   | 57.25/5.4 | 984  | C-terminal (320-469)             |
| 368     | Conglutin $\gamma$ [ <i>Lupinus albus</i> ]                      | Q9FSH9 | 20 | 19   | 49.9/8.39 | 436  |                                  |
| 369     | Conglutin $\gamma$ [ <i>Lupinus albus</i> ]                      | Q9FSH9 | 19 | 16.5 | 49.9/8.39 | 720  | C-terminal (324-452)             |
| 372     | Conglutin $\gamma$ [ <i>Lupinus albus</i> ]                      | Q9FSH9 | 26 | 17   | 49.9/8.39 | 1050 | Central and C-terminal (324-452) |
| 373/384 | Conglutin $\delta$ Seed storage protein [ <i>Lupinus albus</i> ] | Q333K7 | 41 | 13   | 17.6/5.47 | 514  | Central and C-terminal (75-140)  |
| 373/384 | Vicilin-like protein (Fragment) [ <i>Lupinus albus</i> ]         | Q53HY0 | 11 | 13   | 62.0/6.08 | 286  | Central (427-496)                |
| 374     | BLAD (Fragment) [ <i>Lupinus albus</i> ]                         | Q0R0N3 | 9  | 15   | 20.4/9.66 | 107  | Central (98-114)                 |
| 374     | Conglutin $\gamma$ [ <i>Lupinus albus</i> ]                      | Q9FSH9 | 2  | 17   | 49.9/8.39 | 70   | C-terminal (442-452)             |
| 375     | Conglutin $\gamma$ [ <i>Lupinus albus</i> ]                      | Q9FSH9 | 26 | 16   | 49.9/8.39 | 954  |                                  |
| 376     | Conglutin $\gamma$ [ <i>Lupinus albus</i> ]                      | Q9FSH9 | 65 | 16   | 49.9/8.39 | 829  | Central and C-terminal (59-452)  |

|     |                                                                  |        |    |      |           |      |                                  |
|-----|------------------------------------------------------------------|--------|----|------|-----------|------|----------------------------------|
| 376 | Vicilin-like protein (Fragment) [ <i>Lupinus albus</i> ]         | Q53HY0 | 28 | 16   | 62.0/6.08 | 768  |                                  |
| 377 | Conglutin $\gamma$ [ <i>Lupinus albus</i> ]                      | Q9FSH9 | 36 | 18   | 49.9/8.39 | 1140 | Central and C-terminal (162-452) |
| 378 | Conglutin $\gamma$ [ <i>Lupinus albus</i> ]                      | Q9FEX1 | 31 | 16   | 50.2/6.61 | 863  | Central and C-terminal (303-448) |
| 381 | Vicilin-like protein (Fragment) [ <i>Lupinus albus</i> ]         | Q53HY0 | 37 | 14   | 62.0/6.08 | 1045 | Central (206-473)                |
| 381 | Conglutin $\delta$ Seed storage protein [ <i>Lupinus albus</i> ] | Q333K7 | 35 | 14   | 17.6/5.47 | 417  | Central and C-terminal (75-131)  |
| 383 | Vicilin like protein [ <i>Lupinus albus</i> ]                    | Q53HY0 | 12 | 14.5 | 62.0/6.08 | 731  | Central (206-473)                |
| 385 | Conglutin $\delta$ [ <i>Lupinus albus</i> ]                      | Q333K7 | 35 | 15   | 17.6/5.47 | 394  | Central and C-terminal (75-131)  |
| 386 | Vicilin-like protein (Fragment) [ <i>Lupinus albus</i> ]         | Q53HY0 | 27 | 13   | 62.0/6.08 | 840  | Central (154-463)                |
| 386 | Conglutin $\delta$ Seed storage protein [ <i>Lupinus albus</i> ] | Q333K7 | 35 | 13   | 17.6/5.47 | 438  | Central and C-terminal (75-131)  |
| 387 | Conglutin $\delta$ Seed storage protein [ <i>Lupinus albus</i> ] | Q333K7 | 35 | 14   | 17.6/5.47 | 421  | Central and C-terminal (75-131)  |
| 388 | Conglutin $\delta$ [ <i>Lupinus albus</i> ]                      | Q333K7 | 20 | 13   | 17.6/5.47 | 289  | C-terminal (101-131)             |
| 388 | Conglutin $\gamma$ [ <i>Lupinus albus</i> ]                      | Q9FSH9 | 17 | 13   | 49.9/8.39 | 261  |                                  |
| 389 | Vicilin-like protein (Fragment) [ <i>Lupinus albus</i> ]         | Q53HY0 | 26 | 18   | 62.0/6.08 | 893  | Central (194-463)                |
| 389 | Conglutin $\delta$ Seed storage protein [ <i>Lupinus albus</i> ] | Q333K7 | 35 | 18   | 17.6/5.47 | 352  | Central and C-terminal (75-131)  |
| 389 | Conglutin $\gamma$ [ <i>Lupinus albus</i> ]                      | Q9FSH9 | 10 | 18   | 49.9/8.39 | 162  | Central (379-426)                |

**Table S2.** List of the identified protein spots with differences in relative abundances of Modica Ecotype vs Luxor cultivar comparison. Spots numbers are referred to **Figure S8**.

| Spot | Protein [Organism]                                             | Accession Number | Coverage % | Exp Mr | Theor Mr/pI | Matched Peptides | Unique Peptides | MASCOT score | ANOVA     | Fold      | Sequence region        |
|------|----------------------------------------------------------------|------------------|------------|--------|-------------|------------------|-----------------|--------------|-----------|-----------|------------------------|
| 31*  | vicilin-like protein [Lupinus albus]                           | Q53HY0           | 26         | 30     | 62/6.08     | 11               | 2               | 732          | 9.110E-04 | 0.20<br>2 |                        |
|      | beta-conglutin precursor [Lupinus albus]                       | Q6EBC1           | 23         | 30     | 62.1/6.43   | 11               | 2               | 706          |           |           | N-terminal and Central |
|      | conglutin gamma [Lupinus albus]                                | Q9FSH9           | 11         | 30     | 49.9/8.39   | 5                | 3               | 404          |           |           | N-terminal and Central |
|      | conglutin gamma [Lupinus albus]                                | Q9FEX1           | 6          | 30     | 50.2/6.61   | 3                | 1               | 346          |           |           |                        |
|      | conglutin gamma 2 [Lupinus angustifolius]                      | F5B8W7           | 7          | 30     | 47.9/6.42   | 3                | 1               | 282          |           |           | N-terminal and Central |
|      | conglutin beta 6 [Lupinus angustifolius]                       | F5B8W4           | 6          | 30     | 70.1/6.18   | 3                | 1               | 100          |           |           | Central                |
| 41*  | vicilin-like protein [Lupinus albus]                           | Q53HY0           | 27         | 35     | 62/6.08     | 12               | 3               | 1279         | 1.200E-03 | 0.31<br>5 | Central                |
| 43*  | vicilin-like protein [Lupinus albus]                           | Q53HY0           | 41         | 40     | 62/6.08     | 24               | 8               | 2293         | 2.510E-04 | 0.24<br>3 | Central                |
|      | beta-conglutin precursor [Lupinus albus]                       | Q6EBC1           | 34         | 40     | 62.1/6.43   | 19               | 3               | 1926         |           |           | Central                |
| 49*  | conglutin alpha 2 [Lupinus angustifolius]                      | F5B8V7           | 6          | 42     | 74.6/5.12   | 2                | 1               | 268          | 1.500E-03 | 2.25<br>3 | C-terminal             |
|      | seed storage protein [Lupinus angustifolius]                   | F5B8V8           | 7          | 42     | 57.2/5.45   | 2                | 1               | 189          |           |           | C-terminal             |
|      | conglutin delta seed storage protein precursor [Lupinus albus] | Q333K7           | 20         | 42     | 17.6/5.47   | 2                | 2               | 150          |           |           | C-terminal             |
|      | putative TAG factor protein [Lupinus angustifolius]            | AAN15136         | 9          | 42     | 32.5/6.33   | 2                | 2               | 86           |           |           |                        |

**Table S3.** List of identified proteins resulting exclusive of Modica Ecotype in the comparison with Luxor cv. Spots numbers are referred to **Figure S8**.

| Spot | Protein [Organism] | Accession Number | Coverage % | Exp.Mr | Theor. Mr/pI | Matched Peptides | Unique Peptides | MASCOT score | ANOVA | NOTE |
|------|--------------------|------------------|------------|--------|--------------|------------------|-----------------|--------------|-------|------|
|------|--------------------|------------------|------------|--------|--------------|------------------|-----------------|--------------|-------|------|



|      |                                                                |              |    |    |              |   |   |     |           |                           |
|------|----------------------------------------------------------------|--------------|----|----|--------------|---|---|-----|-----------|---------------------------|
| 72*  | NI                                                             |              |    | 10 |              |   |   |     |           |                           |
| 75*  | NI                                                             |              |    | 15 |              |   |   |     |           |                           |
| 84*  | 1-Cys peroxiredoxin-like [Glycine max]                         | XP_003531110 | 13 | 25 | 24.5<br>/6.4 | 3 | 3 | 346 | 2.360E-04 | Central                   |
|      | beta-conglutin precursor [Lupinus albus]                       | Q6EBC1       | 9  | 25 | 62.1<br>/6.4 | 4 | 4 | 268 |           | Central                   |
|      | 1-Cys peroxiredoxin [Medicago truncatula]                      | REHY_MEDTR   | 13 | 25 | 24.6<br>/6.0 | 3 | 3 | 185 |           | N-terminal and<br>Central |
| 112* | conglutin delta seed storage protein precursor [Lupinus albus] | Q333K7       | 20 | 15 | 17.6<br>/5.4 | 2 | 2 | 290 | 9.260E-03 | C-terminal                |
|      | conglutin alpha 2 [Lupinus angustifolius]                      | F5B8V7       | 6  | 15 | 74.6<br>/5.1 | 2 | 2 | 223 |           | C-terminal                |

**Table S4.** List of identified proteins resulting exclusive of Luxor cv in the comparison with Modica Ecotype. Spots numbers are referred to **Figure S8**.

| Spot | Protein [Organism]                        | Accession Number | Coverage % | Exp.Mr | Theor.Mr/pI | Matched Peptides | Unique Peptides | MASCOT score | ANOVA     | NOTE                   |
|------|-------------------------------------------|------------------|------------|--------|-------------|------------------|-----------------|--------------|-----------|------------------------|
| 125* | vicilin-like protein [Lupinus albus]      | Q53HY0           | 12         | 14.5   | 62.0/6.08   | 8                | 6               | 731          | 3.150E-05 | Central                |
|      | beta-conglutin precursor [Lupinus albus]  | Q6EBC1           | 9          | 14.5   | 62.1/6.43   | 4                | 2               | 379          |           | C-terminal             |
| 129* | conglutin gamma [Lupinus albus]           | Q9FSH9           | 9          | 27     | 49.9/8.39   | 3                | 2               | 291          | 4.040E-04 |                        |
|      | beta-conglutin precursor [Lupinus albus]  | Q6EBC1           | 11         | 27     | 62.1/6.43   | 5                | 5               | 195          |           |                        |
|      | 1-Cys peroxiredoxin-like [Glycine max]    | XP_003531110     | 13         | 27     | 24.5/6.44   | 3                | 3               | 160          |           | Central                |
|      | 1-Cys peroxiredoxin [Medicago truncatula] | REHY_MEDTR       | 13         | 27     | 24.6/6.08   | 2                | 2               | 134          |           | N-terminal and Central |

**Table S5.** List of identified proteins resulting exclusive of Taper cv in the Dukat vs Taper cultivar comparison. Spots numbers are referred to **Figure S9**.

| Spot | Protein [organism]                           | Accession Number | Cover age % | Exp. Mr. | Theor. Mr/pI | Matched peptides | Unique peptides | MASCOT score | ANOVA  | Sequence region        |
|------|----------------------------------------------|------------------|-------------|----------|--------------|------------------|-----------------|--------------|--------|------------------------|
| 73*  | Conglutin alpha 3 [Lupinus angustifolius]    | F5B8V8           | 13          | 17       | 67.7/5.31    | 43(14)           | 16              | 582          | 4.5E-3 | Central                |
| 74*  | Seed storage protein [Lupinus angustifolius] | F5B8V8           | 19          | 17       | 57.2/5.45    | 403(230)         | 49              | 648          | 9.8E-3 | Central and C-terminal |
|      | Conglutin gamma [Lupinus angustifolius]      | Q42369           | 3           |          | 49.6/7.66    | 1(1)             | 1               | 57           |        | Central                |
| 76*  | NI                                           |                  |             | 22       |              |                  |                 |              | 6.4E-4 |                        |
| 78*  | Conglutin alpha 1 [Lupinus angustifolius]    | F5B8V6           | 15          | 20       | 58.2/5.26    | 222(95)          | 25              | 566          | 6.6E-3 | Central and C-terminal |
| 79*  | 1-Cys peroxiredoxin [Glycine soja]           | A0A0B2RB28       | 8           | 25       | 24.5/6.90    | 13(2)            | 13              | 67           | 3.3E-5 | Central                |
|      | Uncharacterized protein [Lotus japonicas]    | I3SM62           | 9           |          | 24.8/6.12    | 7(2)             | 7               | 64           |        | N-terminal             |
| 80*  | NI                                           | -                | -           | 26       | -            | -                | -               | -            | 4.5E-3 |                        |

**Table S6.** List of identified proteins resulting exclusive of Dukat cv in the Dukat vs Taper cultivar comparison. Spots numbers are referred to **Figure S9**.

| Spot | Protein [organism]                                  | Accession Number | Cover age % | Exp. Mr. | Theor. Mr/pI | Matched peptides | Unique peptides | MASCOT score | ANOVA  | Sequence region |
|------|-----------------------------------------------------|------------------|-------------|----------|--------------|------------------|-----------------|--------------|--------|-----------------|
| 88*  | NI                                                  | -                | -           | 20       | -            | -                |                 | -            | 3.3E-3 |                 |
| 99*  | Annexin-like protein RJ4 [Glycine soja]             | A0A0B2QZN2       | 14          | 30       | 35.8/7.12    | 12(4)            | 3               | 223          | 6.2E-5 | Central         |
|      | Putative TAG factor protein [Lupinus angustifolius] | Q8GSE7           | 13          |          | 32.5/6.33    | 8(6)             | 1               | 201          |        | Central         |

**Table S7.** List of identified proteins resulting exclusive of Taper cv in the Mister vs Taper cultivar comparison. Spots numbers are referred to **Figure S10**

| Spot | Protein [organism]                       | Accession Number | Coverage % | Exp. Mr. | Theor. Mr/pI | Matched peptides | Unique peptides | MASCOT score | ANOVA  | Sequence region   |
|------|------------------------------------------|------------------|------------|----------|--------------|------------------|-----------------|--------------|--------|-------------------|
| 66*  | Annexin [Medicago truncatula]            | G7KB73           | 14         | 30       | 36.3/7.14    | 26(7)            | 7               | 301          | 6.8E-4 |                   |
|      | Annexin D1 [Glycine soja]                | A0A0B2SDH4       | 12         |          | 36.1/6.48    | 18(7)            | 1               | 280          |        |                   |
|      | Annexin [Arabis alpine]                  | A0A087G1V1       | 11         |          | 36.3/5.29    | 10(3)            | -               | 167          |        | Central (87-267)  |
|      | Annexin [Brassica napus]                 | A0A078CEH0       | 11         |          | 36.2/5.27    | 5(2)             | 1               | 155          |        |                   |
|      | Annexin [Theobroma cacao]                | A0A061DJJ7       | 12         |          | 36.0/6.22    | 5(1)             | 3               | 128          |        |                   |
|      | Conglutin beta 5 [Lupinus angustifolius] | F5B8W3           | 5          |          | 75.2/5.75    | 2(0)             | 1               | 95           |        | Central (307-381) |
|      | Annexin [Phaseolus vulgaris]             | V7B5V0           | 3          |          | 35.9/8.23    | 5(3)             | 2               | 69           |        | Central (64-75)   |

**Table S8.** List of identified proteins resulting exclusive of Mister cv in the Mister vs Taper cultivar comparison. Spots numbers are referred to **Figure S10**

| Spot | Protein [organism]                                        | Accession Number | Coverage % | Exp. Mr. | Theor. Mr/pI | Matched peptides | Unique peptides | MASCOT score | ANOVA  | Sequence region                  |
|------|-----------------------------------------------------------|------------------|------------|----------|--------------|------------------|-----------------|--------------|--------|----------------------------------|
| 81*  | Conglutin alpha 1 [Lupinus angustifolius]                 | F5B8V6           | 7          | 12       | 58.1/5.26    | 8(3)             | 5               | 135          | 4.6E-4 | C-terminal (447-483)             |
|      | BnaA10g19320D protein [Brassica napus]                    | A0A078C3J4       | 3          |          | 50.3/8.61    | 14(2)            | 2               | 67           |        | Centrali (266-281)               |
| 82*  | Uncharacterized protein [Jatropha curcas]                 | A0A067K1S4       | 2          | 12       | 55.0/9.26    | 9(1)             | 3               | 70           | 1.8E-4 | C-terminal (445-458)             |
| 83*  | Conglutin delta 1 [Lupinus angustifolius]                 | F5B8W8           | 20         | 12       | 18.2/5.47    | 9(3)             | 6               | 171          | 1.3E-4 | C-terminal (105-135)             |
|      | Kinase, putative [Ricinus communis]                       | B9RES6           | 1          |          | 90.5/5.29    | 34(0)            | 3               | 170          |        | C-terminal (707-721)             |
|      | Conglutin alpha 1 [Lupinus angustifolius]                 | F5B8V6           | 7          |          | 58.1/5.26    | 13(10)           | 3               | 136          |        | C-terminal (467-493)             |
|      | Uncharacterized protein [Brassica rapa subsp. Pekinensis] | M4EZI2           | 6          |          | 35.1/7.68    | 115(1)           | 3               | 61           |        | Central (201-218)                |
| 85*  | Conglutin delta 1 [Lupinus angustifolius]                 | F5B8W8           | 20         | 15       | 18.2/5.47    | 11(9)            | 8               | 169          | 7.2E-4 | Central (105-135)                |
|      | Conglutin alpha 1 [Lupinus angustifolius]                 | B0YJF7           | 7          |          | 58.1/5.26    | 2(1)             | 2               | 122          |        | Central (447- 483)               |
|      | Kinesin-like protein [Arabidopsis thaliana]               | V7ALP7           | 3          |          | 66.4/9.59    | 3(0)             | 2               | 84           |        |                                  |
| 92*  | Conglutin alpha 1 [Lupinus angustifolius]                 | F5B8V6           | 15         | 24       | 58.1/5.26    | 295(131)         | 31              | 531          | 5.9E-3 |                                  |
|      | Legumin-like protein [Lupinus albus]                      | Q53I54           | 12         |          | 58.8/5.33    | 74(17)           | 4               | 244          |        | Central and C-terminal (338-519) |
| 96*  | Putative TAG factor protein [Lupinus angustifolius]       | Q8GSE7           | 13         | 30       | 32.5/6.33    | 11(9)            | 2               | 216          | 8.5E-3 |                                  |

|                                                         |                |   |           |      |   |     |                   |
|---------------------------------------------------------|----------------|---|-----------|------|---|-----|-------------------|
| Conglutin beta<br>(Fragment) [Lupinus<br>angustifolius] | B0YJF7         | 7 | 61.5/5.34 | 5(1) | - | 148 | Central (131-149) |
| Annexin [Phaseolus<br>vulgaris]                         | V7ALP7         | 7 | 35.9/8.57 | 4(4) | - | 146 | Central (64-156)  |
| Annexin-like protein<br>RJ4 [Glycine soja]              | A0A0B2QZN<br>2 | 6 | 35.8/7.12 | 5(3) | - | 127 |                   |

**Table S9.** List of the identified protein spots in Sonet cultivar of *Lupinus angustifolius*. Spots are referred to **Figure 3B**.

| Spot | Protein [organism]                                    | Accession Number | Cover age % | Exp Mr. | Theor. Mr/pI | MASCOT score | Sequence region (amino acid position) |
|------|-------------------------------------------------------|------------------|-------------|---------|--------------|--------------|---------------------------------------|
| 161  | Conglutin $\beta$ 5 [ <i>Lupinus angustifolius</i> ]  | F5B8W3           | 26          | 40      | 75.2/5.75    | 1073         | Central (103-375)                     |
| 166  | Conglutin $\beta$ [ <i>Lupinus angustifolius</i> ]    | B0YJF8           | 24          | 40      | 54.3/6.27    | 576          | Central (214-339)                     |
| 177  | Conglutin $\beta$ [ <i>Lupinus angustifolius</i> ]    | B0YJF8           | 32          | 40      | 54.3/6.27    | 1119         | Central (111-339)                     |
| 192  | Conglutin $\beta$ [ <i>Lupinus angustifolius</i> ]    | B8Q5G0           | 20          | 38      | 71.8/5.82    | 683          | Central (214-591)                     |
| 194  | Conglutin $\beta$ 1 [ <i>Lupinus angustifolius</i> ]  | F5B8V9           | 26          | 30      | 71.9/5.82    | 1016         | Central (111-538)                     |
| 195  | Conglutin $\beta$ 2 [ <i>Lupinus angustifolius</i> ]  | F5B8W0           | 36          | 39      | 70.6/5.64    | 1227         | Central and C-terminal (175-576)      |
| 205  | Conglutin $\beta$ 2 [ <i>Lupinus angustifolius</i> ]  | F5B8W0           | 28          | 30      | 70.6/5.64    | 1164         | Central (82-573)                      |
| 214  | Conglutin $\beta$ 2 [ <i>Lupinus angustifolius</i> ]  | F5B8W0           | 31          | 29      | 70.6/5.64    | 1090         | Central and C-terminal (113-576)      |
| 218  | Conglutin $\beta$ 4 [ <i>Lupinus angustifolius</i> ]  | F5B8W2           | 36          | 29      | 69.7/5.96    | 1274         | Central and C-terminal (172-570)      |
| 224  | Conglutin $\beta$ 4 [ <i>Lupinus angustifolius</i> ]  | F5B8W2           | 40          | 29      | 69.4/5.96    | 1226         | Central and C-terminal (202-570)      |
| 226  | Conglutin $\beta$ 4 [ <i>Lupinus angustifolius</i> ]  | F5B8W2           | 47          | 29      | 69.4/5.96    | 1470         | Central and C-terminal (170-570)      |
| 228  | Conglutin $\beta$ 2 [ <i>Lupinus angustifolius</i> ]  | F5B8W0           | 4           | 29      | 70.6/5.64    | 155          | Central (511-525)                     |
| 231  | Conglutin $\beta$ 3 [ <i>Lupinus angustifolius</i> ]  | F5B8W1           | 33          | 29      | 68.1/5.71    | 1064         | Central and C-terminal (160-560)      |
| 255  | Conglutin $\beta$ 2 [ <i>Lupinus angustifolius</i> ]  | F5B8W0           | 12          | 25      | 70.6/5.64    | 425          | Central (173-535)                     |
| 257  | Conglutin $\beta$ 4 [ <i>Lupinus angustifolius</i> ]  | F5B8W2           | 20          | 25      | 69.4/5.96    | 397          | Central and C-terminal (213-570)      |
| 262  | Conglutin $\beta$ 4 [ <i>Lupinus angustifolius</i> ]  | F5B8W2           | 41          | 25      | 69.4/5.96    | 1256         | Central and C-terminal (170-570)      |
| 265  | Conglutin $\beta$ 4 [ <i>Lupinus angustifolius</i> ]  | F5B8W2           | 37          | 25      | 69.4/5.96    | 1169         | Central and C-terminal (170-570)      |
| 271  | Conglutin $\beta$ 5 [ <i>Lupinus angustifolius</i> ]  | F5B8W3           | 20          | 25      | 75.2/5.75    | 828          | Central (213-376)                     |
| 271  | Conglutin $\alpha$ 1 [ <i>Lupinus angustifolius</i> ] | F5B8V6           | 17          | 25      | 58.2/5.26    | 501          |                                       |
| 273  | Conglutin $\beta$ 4 [ <i>Lupinus angustifolius</i> ]  | F5B8W2           | 18          | 25      | 69.4/5.96    | 705          | Central (170-327)                     |
| 274  | Conglutin $\beta$ 2 [ <i>Lupinus angustifolius</i> ]  | F5B8W0           | 24          | 25      | 70.7/5.64    | 791          |                                       |

|                 |                                                               |        |    |    |           |       |                                  |
|-----------------|---------------------------------------------------------------|--------|----|----|-----------|-------|----------------------------------|
| 274             | Conglutin $\alpha$ 1 [ <i>Lupinus angustifolius</i> ]         | F5B8V6 | 11 | 25 | 58.2/5.26 | 273   | Central and C-terminal (354-483) |
| 275             | Conglutin $\alpha$ 1 [ <i>Lupinus angustifolius</i> ]         | F5B8V6 | 22 | 23 | 58.2/5.26 | 821   | Central and C-terminal (332-503) |
| 275             | Conglutin $\beta$ 2 [ <i>Lupinus angustifolius</i> ]          | F5B8W0 | 22 | 23 | 70.7/5.64 | 770   | Central (172-330)                |
| 279/281/297/295 | Conglutin $\alpha$ 1 [ <i>Lupinus angustifolius</i> ]         | F5B8V6 | 22 | 20 | 58.2/5.26 | 10246 | Central and C-terminal (332-503) |
| 279/281/297/295 | Conglutin $\beta$ 3 [ <i>Lupinus angustifolius</i> ]          | F5B8W1 | 25 | 20 | 68.1/5.71 | 7767  | Central (160-507)                |
| 280             | Conglutin $\beta$ 4 [ <i>Lupinus angustifolius</i> ]          | F5B8W2 | 47 | 20 | 69.4/5.96 | 1325  | Central and C-terminal (170-570) |
| 287             | Conglutin $\alpha$ 1 [ <i>Lupinus angustifolius</i> ]         | F5B8V6 | 20 | 20 | 58.2/5.26 | 11477 | Central and C-terminal (332-503) |
| 287             | Conglutin $\beta$ 2 [ <i>Lupinus angustifolius</i> ]          | F5B8W0 | 22 | 20 | 70.7/5.64 | 722   | Central (172-330)                |
| 307             | Conglutin $\alpha$ 2 [ <i>Lupinus angustifolius</i> ]         | F5B8V7 | 15 | 18 | 74.6/5.12 | 3783  | Central and C-terminal (468-619) |
| 308             | Conglutin $\alpha$ 2 [ <i>Lupinus angustifolius</i> ]         | F5B8V7 | 23 | 17 | 74.6/5.12 | 11127 | Central and C-terminal (468-629) |
| 308             | Conglutin $\beta$ (Fragment) [ <i>Lupinus angustifolius</i> ] | B0YJF7 | 19 | 17 | 61.5/5.34 | 387   | Central (128-243)                |
| 314/324         | Conglutin $\alpha$ 3 [ <i>Lupinus angustifolius</i> ]         | F5B8V8 | 26 | 17 | 57.2/5.45 | 577   | Central and C-terminal (143-459) |
| 316             | Conglutin $\alpha$ 3 [ <i>Lupinus angustifolius</i> ]         | F5B8V8 | 23 | 18 | 57.2/5.45 | 8173  | Central and C-terminal (320-462) |
| 318/319/328     | Conglutin $\beta$ 4 [ <i>Lupinus angustifolius</i> ]          | F5B8W2 | 26 | 17 | 69.4/5.96 | 625   | Central and C-terminal (202-570) |
| 323             | Conglutin $\beta$ (Fragment) [ <i>Lupinus angustifolius</i> ] | B0YJF7 | 18 | 17 | 61.5/5.34 | 649   | N-terminal and Central (29-209)  |
| 325             | Conglutin $\beta$ 1 [ <i>Lupinus angustifolius</i> ]          | F5B8V9 | 23 | 17 | 71.9/5.82 | 807   |                                  |
| 326             | Conglutin $\beta$ 1 [ <i>Lupinus angustifolius</i> ]          | F5B8V9 | 24 | 17 | 71.9/5.82 | 886   |                                  |
| 331             | Chaperone [ <i>Agave tequilana</i> ]                          | A4ZF48 | 47 | 17 | 18.4/6.78 | 671   | Central and C-terminal (56-161)  |
| 332             | Conglutin $\beta$ (Fragment) [ <i>Lupinus angustifolius</i> ] | B0YJF7 | 24 | 17 | 61.5/5.34 | 750   |                                  |
| 334             | Conglutin $\beta$ 2 [ <i>Lupinus angustifolius</i> ]          | F5B8W0 | 30 | 16 | 70.6/5.64 | 730   | Central and C-terminal (113-576) |
| 336/339/345     | Conglutin $\gamma$ [ <i>Lupinus angustifolius</i> ]           | Q42369 | 22 | 16 | 49.6/7.66 | 794   | Central and C-terminal (343-450) |
| 337             | Conglutin $\gamma$ [ <i>Lupinus angustifolius</i> ]           | Q42369 | 22 | 16 | 49.6/7.66 | 23614 | Central and C-terminal (342-450) |
| 338/348         | Conglutin $\beta$ 2 [ <i>Lupinus angustifolius</i> ]          | F5B8W0 | 37 | 16 | 70.7/5.64 | 1083  | Central and C-terminal (111-576) |



|     |                                                      |        |    |    |           |     |                                  |
|-----|------------------------------------------------------|--------|----|----|-----------|-----|----------------------------------|
| 346 | Conglutin $\beta$ 2 [ <i>Lupinus angustifolius</i> ] | F5B8W0 | 8  | 15 | 70.6/5.64 | 257 | Central (112-319)                |
| 346 | Conglutin $\gamma$ [ <i>Lupinus angustifolius</i> ]  | Q42369 | 15 | 15 | 49.6/7.66 | 229 | Central and C-terminal (355-423) |
| 356 | Conglutin $\gamma$ [ <i>Lupinus angustifolius</i> ]  | Q42369 | 44 | 10 | 49.6/7.66 | 722 | Central and C-terminal (67-450)  |
