# Supplementary material for: Multielemental, Nutritional, and Proteomic Characterization of Different Lupinus spp. Genotypes: A Source of Nutrients for Dietary Use
Source: MDPI journal article supplement (doi:10.3390/molecules27248771), 2022-12-10
Supplement: s1 [file s1]

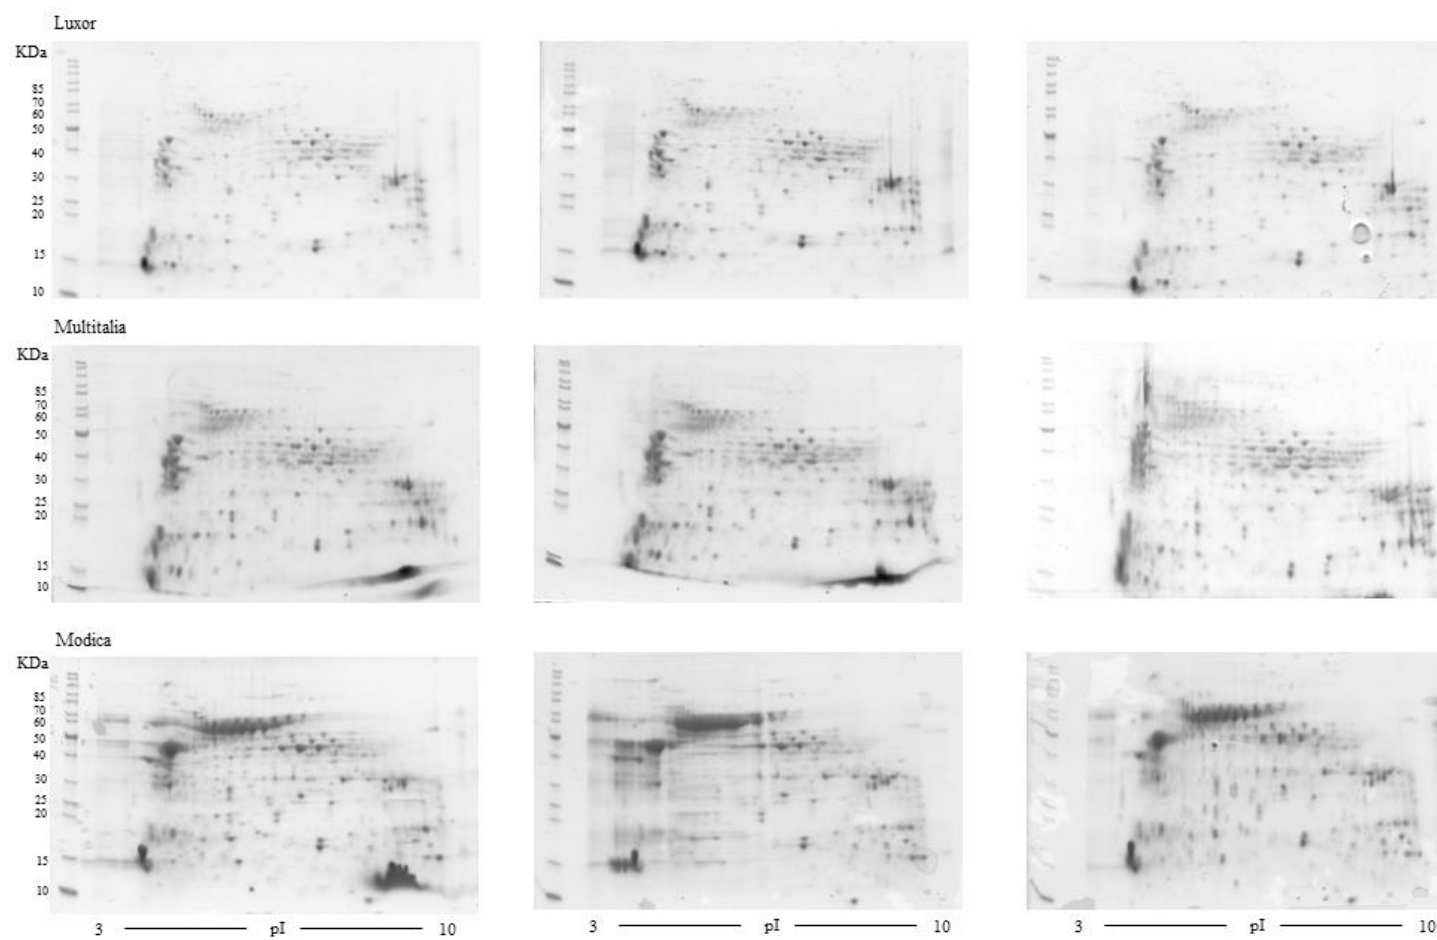

**Figure S1.** 2D gel replicates of *Lupinus albus* cultivars (Luxor, Multitalia and Modica Ecotype)

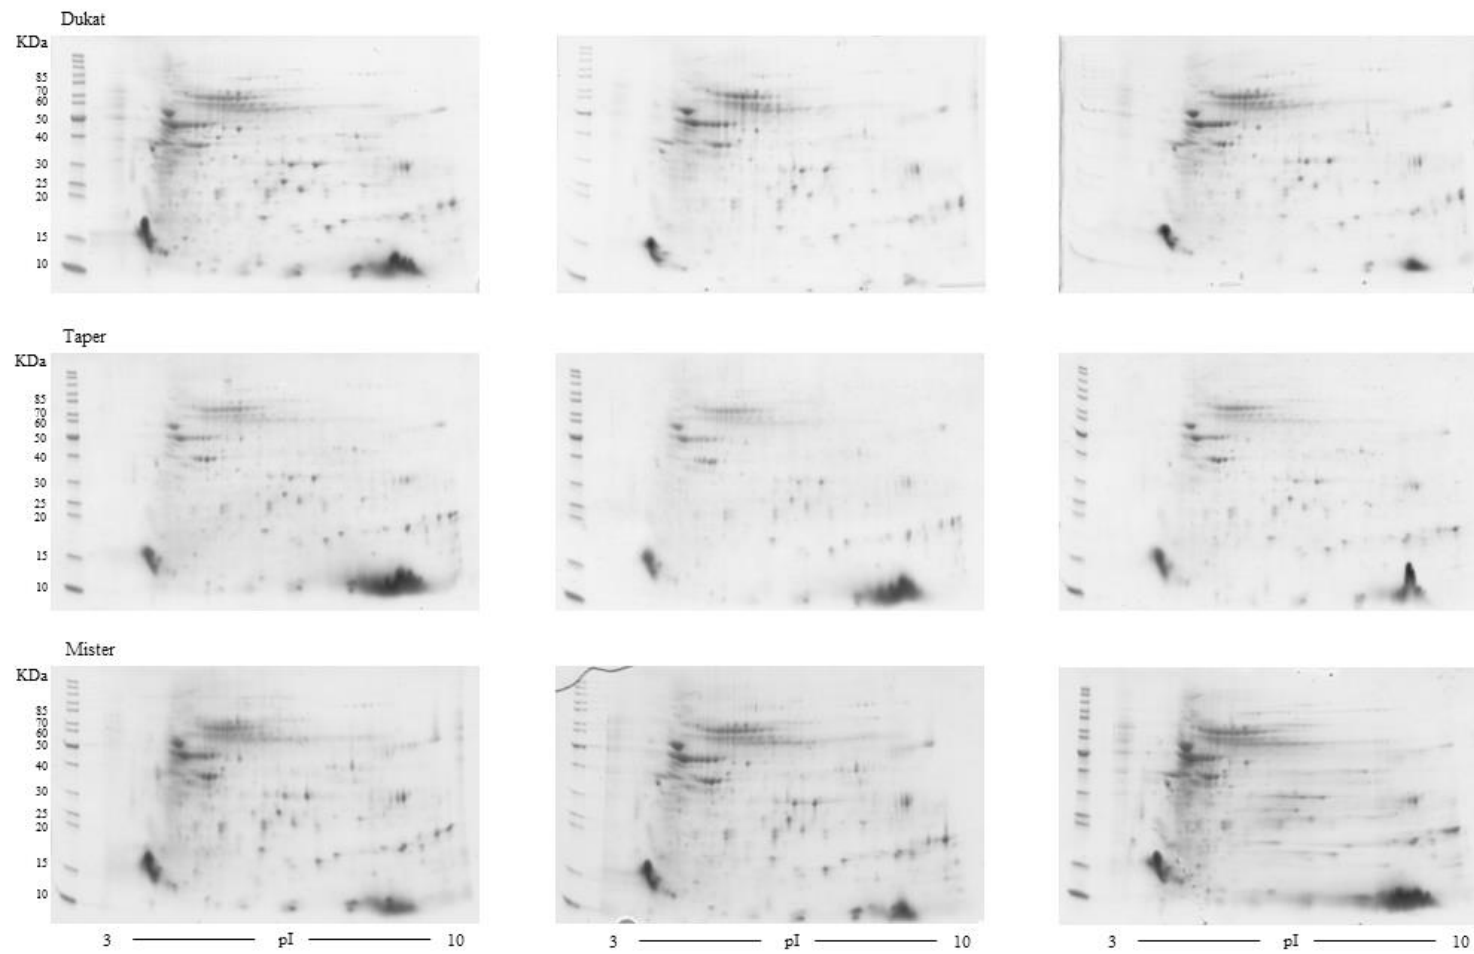

**Figure S2.** 2D gel replicates of *Lupinus luteus* cultivars (Dukat, Taper and Mister)

**Figure S3.** 2D gel replicates of *Lupinus angustifolius* cultivar (Sonet)

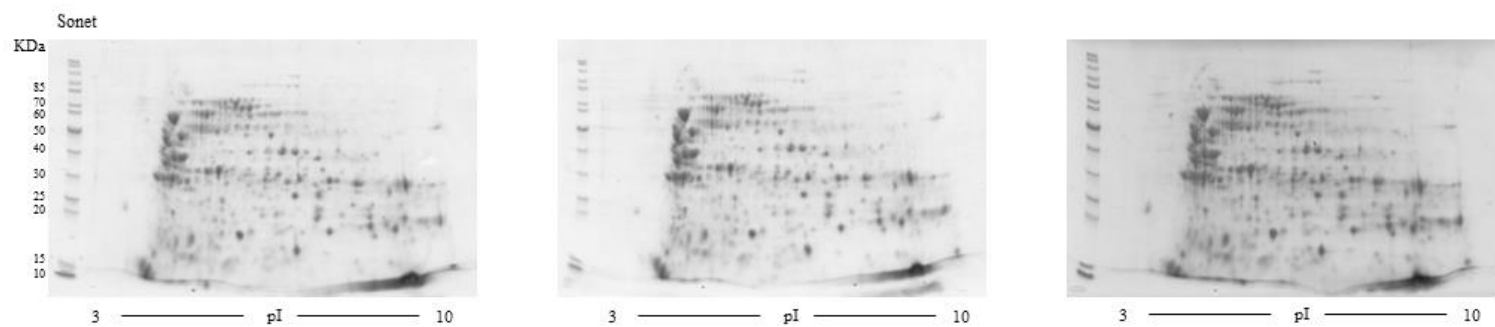

|    |        |             |                                                               |     |
|----|--------|-------------|---------------------------------------------------------------|-----|
| sp | F5B8W0 | CONB2_LUPAN | MANMRVKFPTLVLLLGIVFLMAVSIGIAYGEKNAIKNHERPQEREQEERDPQQPRRHQ    | 60  |
| sp | Q6EBC1 | CONB2_LUPAL | MGKMRVRFPTLVVLGIVFLMAVSIGIAYGEKDLKSHERPEEREQ-----             | 46  |
| sp | Q53HY0 | CONB1_LUPAL | MGKMRVRFPTLVVLGIVFLMAVSIGIAYGEKDLKSHERPEEREQ-----             | 46  |
|    |        |             | *.:***:*****:*****:*****:*.:.***:***                          |     |
|    |        |             |                                                               |     |
| sp | F5B8W0 | CONB2_LUPAN | EEQEREHGREERNREPSRGRSESEESREEEREQRREPSRGREQEQQPHGREEEEEEWQ    | 120 |
| sp | Q6EBC1 | CONB2_LUPAL | -----EEWQ                                                     | 50  |
| sp | Q53HY0 | CONB1_LUPAL | -----EEWQ                                                     | 50  |
|    |        |             | ****                                                          |     |
|    |        |             |                                                               |     |
| sp | F5B8W0 | CONB2_LUPAN | PRRQRPQSRREEREQ--EQGSSSSSGRQSGYERR-----EQREEREQQEQDSRSSESRR   | 172 |
| sp | Q6EBC1 | CONB2_LUPAL | PRRQRPQSRREEREQEQEQQSPSPYPRRQSGYERRQYHERSEQREEREQEQQGSPSYSRR  | 110 |
| sp | Q53HY0 | CONB1_LUPAL | PRRQRPQSRREEREQEQEQQSPSPYPRRQSGYERRQYHERSEQREEREQEQQGSPSYSRR  | 110 |
|    |        |             | *****:*.:.***:***                                             |     |
|    |        |             |                                                               |     |
| sp | F5B8W0 | CONB2_LUPAN | QRNPYYFSYERFQTLYKNRNGQIRVLERFDQRTNRLLENLQNYRIVEFQSKPNTLILPKHS | 232 |
| sp | Q6EBC1 | CONB2_LUPAL | QRNPYHFSSQRFQTLYKNRNGKIRVLERFDQRTNRLLENLQNYRIVEFQSKPNTLILPKHS | 170 |
| sp | Q53HY0 | CONB1_LUPAL | QRNPYHFNSQRFQTLYKNRNGKIRVLERFDQRTNRLLENLQNYRIVEFQSKPNTLILPKHS | 170 |
|    |        |             | *****:*.:.*****:*****:*****:*****:*****:*****                 |     |
|    |        |             |                                                               |     |
| sp | F5B8W0 | CONB2_LUPAN | DADYILVVLNGRATITIVNPDQRQAYNLEHGDALRLPAGTTSYILNPDDNQNLRVVKLAI  | 292 |
| sp | Q6EBC1 | CONB2_LUPAL | DADYVLVVLNGRATITIVNPDQRQAYNLEYGDALRIPAGSTSYILNPDDNQKL RVVKLAI | 230 |
| sp | Q53HY0 | CONB1_LUPAL | DADYVLVVLNGRATITIVNPDQRQAYNLEYGDALRIPAGSTSYILNPDDNQKL RVVKLAI | 230 |
|    |        |             | *****:*****:*****:*****:*****:*****:*****                     |     |
|    |        |             |                                                               |     |
| sp | F5B8W0 | CONB2_LUPAN | PINNPGNFYDFYPSSTKDQQSYFNGFSRNTLEATFNTRYEEIQRILLGNEDGQEDEEQSR  | 352 |
| sp | Q6EBC1 | CONB2_LUPAL | PINNPGYFYDFYPSSTKDQQSYFSGFSRNTLEATFNTRYEEIQRILLGNEDQEYEEQRR   | 290 |
| sp | Q53HY0 | CONB1_LUPAL | PINNPGYFYDFYPSSTKDQQSYFSGFSRNTLEATFNTRYEEIQRILLGNEDQEYEEQRR   | 290 |
|    |        |             | *****:*****:*****:*****:*****:*****:*****                     |     |
|    |        |             |                                                               |     |
| sp | F5B8W0 | CONB2_LUPAN | GQEQSHQDQGVIVRVSKEQIQELRKHAQSSSGKGKPSSESGPFNLRSDEPIYSNKGNFYE  | 412 |
| sp | Q6EBC1 | CONB2_LUPAL | GQEQSDQDEGVIIVSKKQIQKLTKHAQSSSGKDKPSDSGPFNLRSNEPIYSNKGNFYE    | 350 |
| sp | Q53HY0 | CONB1_LUPAL | GQEQSHQDEGVIIVRVSREQIQELTKYAQSSSGKDKPSQSGPFNLRSNEPIYSNKGNFYE  | 350 |
|    |        |             | *****:***:***:***:***:***:***:*****:*****:*****:*****         |     |
|    |        |             |                                                               |     |
| sp | F5B8W0 | CONB2_LUPAN | ITPDRNPQAQDLDISLTFIEINEGGLLLPHYNSKAIFV VVVDEGEGNYELVGIRDQERQQ | 472 |
| sp | Q6EBC1 | CONB2_LUPAL | ITPDRNPQVQDLNISLTYIKINEGALLPHYNSKAIV VVVDEGEGNYELVGIRDQQRQQ   | 410 |
| sp | Q53HY0 | CONB1_LUPAL | ITPDRNPQVQDLDISLTFTEINEGALLPHYNSKAIFIVVVGEGNGKYELVGIRDQQRQQ   | 410 |
|    |        |             | *****:***:***:***:*****:*****:*****:*****:*****:*****         |     |
|    |        |             |                                                               |     |
| sp | F5B8W0 | CONB2_LUPAN | DEQE--QEEVRRYNAKLSEGDIFVIPAGHPISINASSNLRLLGFGINADENQRNFLAGSE  | 530 |
| sp | Q6EBC1 | CONB2_LUPAL | DEQEEKEEEVIRYSARLSEGDIFVIPAGYPISINASSNLRLLGFGINADENQRNFLAGSK  | 470 |
| sp | Q53HY0 | CONB1_LUPAL | DEQEEPEEEVRRYSARLSEGDIFVIPAGYPISVNASSNLRLLGFGINAYENQRNFLAGSE  | 470 |
|    |        |             | ****:***:***:***:*****:*****:*****:*****:*****:*****          |     |
|    |        |             |                                                               |     |
| sp | F5B8W0 | CONB2_LUPAN | DNVIRQLDKEVKQLTFPGSVEDVERLIKNQQQSYFANAQPPQQQ--QREKEGRRGRRLS   | 588 |
| sp | Q6EBC1 | CONB2_LUPAL | DNVIRQLDRAVNELTFPGSAEDIERLIKNQQQSYFANGQPQQQQQQQSEKEGRRGRRGSS  | 530 |
| sp | Q53HY0 | CONB1_LUPAL | DNVIRQLDREVKELTFPGSAEDIERLIKNQQQSYFANALPQQQ--QQSEKEGRRGRRGPI  | 528 |
|    |        |             | *****:*.:.*****:*****:*****:*****:*****:*****                 |     |
|    |        |             |                                                               |     |
| sp | F5B8W0 | CONB2_LUPAN | FPFRSLFTKLLSTIM                                               | 603 |
| sp | Q6EBC1 | CONB2_LUPAL | LPF-----                                                      | 533 |
| sp | Q53HY0 | CONB1_LUPAL | SSI-----                                                      | 531 |
|    |        |             | :                                                             |     |

**Figure S4.** Sequence alignment of  $\beta$ -globulin/vicilin F5B8W0, Q6EBC1, and Q53HY0.

|                        |                                                               |     |
|------------------------|---------------------------------------------------------------|-----|
| tr Q53I54 Q53I54_LUPAL | MSNKLLALSFLPFLLLFFCGCFASFRQPQENECQFQRLNALEPDNTVQSEAGTIETW     | 60  |
| tr Q53I55 Q53I55_LUPAL | -----                                                         | 0   |
| tr Q53I54 Q53I54_LUPAL | NPKNDELRCAGVALSRCTIQRNGLRRPFYTNAPQEIYIQQGRGIFGMIFPGCGETYEPEQ  | 120 |
| tr Q53I55 Q53I55_LUPAL | -----                                                         | 0   |
| tr Q53I54 Q53I54_LUPAL | ESEKGQGPRPQDRHQKVEHFKEGDIIAVPTGIPFWMYNDGQTPVVAITLIDTTLNLDNQLD | 180 |
| tr Q53I55 Q53I55_LUPAL | -----                                                         | 0   |
| tr Q53I54 Q53I54_LUPAL | QIPRRFYLSGNQEQLQYQKEGGQGQQEGGNVLSGDFDEFLEEALSVNKEIVRNIGK      | 240 |
| tr Q53I55 Q53I55_LUPAL | -----                                                         | 0   |
| tr Q53I54 Q53I54_LUPAL | KNDDREGGIVEVKGGLKVIIPPTMRPRHGREEEEEEEEDERRGDRRRRHPHHHHHEEEE   | 300 |
| tr Q53I55 Q53I55_LUPAL | -----PVNRQLRSV-----FPGRPTRPGDRRRRHPHHHHHEEEE                  | 34  |
|                        | *: *: : . * *****                                             |     |
| tr Q53I54 Q53I54_LUPAL | EEEEWSHQVRRVRRPHRHHHRKDRNGLEETLCTMKLRHNIGESTSPDAYNPQAGRFT     | 360 |
| tr Q53I55 Q53I55_LUPAL | EEEEWSHQVRRVRRPHRHHHRKDRNGLEETLCTMKLRHNIGESTSPDAYNPQAGRFT     | 94  |
|                        | *****                                                         |     |
| tr Q53I54 Q53I54_LUPAL | LTSIDFPILGWLGLAAEHGSIYKNALFVPYNNVANSILYVLNGSAWFQVDCSGNAVFN    | 420 |
| tr Q53I55 Q53I55_LUPAL | LTSIDFPILGWLGLAAEHGSN-KNALFVPYNNVANSILYVLNGSAWFQVDCSGNAVFN    | 153 |
|                        | *****                                                         |     |
| tr Q53I54 Q53I54_LUPAL | GELNEGQVLTIPQNYAAAIKSLSDNFRYVAFKTDIPQIATLAGANSEISALPLEVVAHA   | 480 |
| tr Q53I55 Q53I55_LUPAL | GELNEGQVLTIPQNYAAAIKSLSDNFRYVAFKTDIPQIATLAGANSEISALPLEVVAHA   | 213 |
|                        | *****                                                         |     |
| tr Q53I54 Q53I54_LUPAL | FNLNRDQARQLKNNNPYKFLVPPQSQLRAVA                               | 512 |
| tr Q53I55 Q53I55_LUPAL | FNLNRAQARQLKNTNPYKFLVPPQSQLRAVA                               | 245 |
|                        | ***** *****.*****                                             |     |

**Figure S5.** Sequence alignment of legumin-like proteins Q53I54 and Q53I55.

|                       |                                                               |     |
|-----------------------|---------------------------------------------------------------|-----|
| sp F5B8V6 CONA1_LUPAN | MANK-LLALS--LFL-LFSGCFSTFRQQPQQNECQFQRLNALEPDNSVKSEAGTIETWN   | 56  |
| sp F5B8V7 CONA2_LUPAN | MAKPCLFSLCLLLL-SSLCLAE---RPERYKECQLDRLNALEPDNRVESEGGVTETWN    | 56  |
| sp F5B8V8 CONA3_LUPAN | MANPFLSLSLCLVLLYSACLGE--GLDRFNQCQLDRLNALEPDNRIESEGGVTETWN     | 57  |
|                       | **: *::* *.** * *::: : :****:***** :*:*. ****                 |     |
| sp F5B8V6 CONA1_LUPAN | PNNDQLRCAGVALSRCTIQNRGLRRPFYTNAPQEIYIQQGRGIFGLIFPGCRETYEEPQE  | 116 |
| sp F5B8V7 CONA2_LUPAN | SNRPELRCAGVAFEKHTIQPQGLHLPSTYNTYPQLIFIVEGEGALGISVPGCTETYEAAQQ | 116 |
| sp F5B8V8 CONA3_LUPAN | SNKPELRCAGVAFEKHTIEPKGLHLPSTYNTYPQIIMIVQGEALGISVPGCTETFEAAQQ  | 117 |
|                       | *. :*****:.. **: **: * *** * * * :*. * :*. :*** **:*** *:     |     |
| sp F5B8V6 CONA1_LUPAN | QEQQGQP-----RPQDRHQKVEHFREGDIIAVPTGVPFWMYNNQTPVIAITL          | 164 |
| sp F5B8V7 CONA2_LUPAN | SQSSQDPRRRSSRSQSQEQQQDSHQKIQYFREGDIIAIPPGIPYWTYNYGEQRLVAINL   | 176 |
| sp F5B8V8 CONA3_LUPAN | SQSRQERRRG---QRSQSQEQQEDSHQKIRHFREGDILVIPPGTPYWTYNYGDEQLVAINL | 174 |
|                       | .. * . :* ****:*****:.* * * * * : :*** *                      |     |
| sp F5B8V6 CONA1_LUPAN | IDTTNLDNQLDQIPRRFYLSGNQEQLFYQQKEGGQQQQ-----EGGNE              | 210 |
| sp F5B8V7 CONA2_LUPAN | LDTTSLNQLDPSPRRFYIAGNPEEEHPETQEQQQQREQQQAGGRRRGKHQQEQEEEG     | 236 |
| sp F5B8V8 CONA3_LUPAN | LDTTSLNQLDPNPRRFYLAGNPEEEYPETQQQR-QRQQHQRPQSGRRRHGQHQQEEEG    | 233 |
|                       | :***.* **** *****:*** *:. : *:. * :*: : :                     |     |
| sp F5B8V6 CONA1_LUPAN | GGNVLSGFNDFLEEAFFSVDREIVRNKGNDDREGSIVEVKEGLKVISPTLRPQGRE      | 270 |
| sp F5B8V7 CONA2_LUPAN | KNNVLSGFDPQFLTQAFNVDEEIIINRLQNP-DELRKQIVRVKRGSLIISPKSQEEEE--  | 293 |
| sp F5B8V8 CONA3_LUPAN | KNNILSGFDPQFLSQALNIDETVHKLQNP-NERIKQIRVEEGLGVISPKWQEQEEEE     | 292 |
|                       | .*:****: :** *:.:..: :.:. :*: .*.:.:*** :*** . :              |     |
| sp F5B8V6 CONA1_LUPAN | EE-----E-EEEEEEERRGDRR-----HR-----PHHH-EEE-                   | 297 |
| sp F5B8V7 CONA2_LUPAN | EEEEPRQGRQPERREERREEEEEEEEDEPRSRERYERQSRRRPGRQQGRQEEQEEES     | 353 |
| sp F5B8V8 CONA3_LUPAN | EKEEPRQRRRRERREERREEEKEE---EDEPRESR-----HR-----GGHE-EEEV      | 335 |
|                       | *: * * * * * * * * : .. ***                                   |     |
| sp F5B8V6 CONA1_LUPAN | -----EEEEWSHQVRRV-----                                        | 310 |
| sp F5B8V7 CONA2_LUPAN | ESEQEGRGQREWERTTRHRRRAQEEGEEEEETSTRVRRQQGRGRGQEQGQEQEQEQEQ    | 413 |
| sp F5B8V8 CONA3_LUPAN | EEERGRGRGSEWKRTTRRRHTRGDEGQEEETTTTTEE-----                    | 374 |
|                       | **.: .*:                                                      |     |
| sp F5B8V6 CONA1_LUPAN | -----RRPHHHREDRNGLEETLCTLKLHNIG                               | 337 |
| sp F5B8V7 CONA2_LUPAN | EEEQEGRRGRHGGRGRRSGQQREEEEEQQQQGRKRQESRNGLEETICTARLLENIA      | 473 |
| sp F5B8V8 CONA3_LUPAN | -----RRRRRGGRSGRQEE-----E-----EEQSPPRSRNGLEETICTAILRENIA      | 415 |
|                       | : ..*****:*** * .**.                                          |     |
| sp F5B8V6 CONA1_LUPAN | QSTSPDAYNPQAGRLKTLTSLDFPILRWLGAAEHGSIYKNAMFVPPYNNVANSILYVLN   | 397 |
| sp F5B8V7 CONA2_LUPAN | KPSRADLYNPNAGRISVNSLTLPILRWFLSADYVNLRYNGIYAPHWNINANSVIFVTR    | 533 |
| sp F5B8V8 CONA3_LUPAN | DPTRADLYNPAGRISTANSLTLPILGWFLSAEYVNLRYNGIYAPHWNINANSVIYVIR    | 475 |
|                       | . : * *** ****:.. ** :*** * :*: :*: :*: :*: :*: :*            |     |
| sp F5B8V6 CONA1_LUPAN | GSAWFQVVDSCGNAVFNELNEGQVLTIPQNYAVAIKSLDDNFSYVAFKTNDIPQIAALA   | 457 |
| sp F5B8V7 CONA2_LUPAN | GRGRVQVNCQGNVFNDDLRRGQLLVVPQNFVVAHQAGDEGFEFIAFKTNDLAATSP--    | 591 |
| sp F5B8V8 CONA3_LUPAN | GRGRVQVNSQGNVFNDDLRRGQLLVVPQNFVVAHQAGDEGFEFIAFKTNDQATTSP--    | 533 |
|                       | * . .***:..***:*.:.*.:.*:*.:.*:*.:.*:*.:.*:*.:.*:*.:.*:*.:.*: |     |
| sp F5B8V6 CONA1_LUPAN | GLTSSIRALPLDVVAHAFNLDRDQARQLKNNNPYKFLVPPPQ--SQLRAV---A        | 506 |
| sp F5B8V7 CONA2_LUPAN | -VKQVFRGIPAEVLANAFGLRLNQVSQLKYSNGQGPLVSPQSESEDHTLPKVA         | 643 |
| sp F5B8V8 CONA3_LUPAN | -LKQVFRGIPAEVLANAFRLSLNQVSELKYNNGNHNPLVTPQSQSQDHNLVKVA        | 585 |
|                       | :.. :*. * :*:*** * * :*. :*** .. * * * . * : : : *            |     |

**Figure S6.** Sequence alignment of  $\alpha$ -globulin proteins F5B8V6, F5B8V7 and F5B8V8



|                        |                                                                    |     |
|------------------------|--------------------------------------------------------------------|-----|
| tr B0YJF8 B0YJF8_LUPAN | MAKMRVRLPMLILLGVVFLLAASIGIAYGEKDFTKNP---PKEREEEEHEPRQOPRPRQ        | 58  |
| sp F5B8V9 CONB1_LUPAN  | MAKMRVRLPMLILLGVVFLLAASIGIAYGEKDFTKNP---PKEREEEEHEPRQOPRPRQ        | 58  |
| tr B8Q5G0 B8Q5G0_LUPAN | MAKMRVRLPMLILLGVVFLLAASIGIAYGEKDFTKNP---PKEREEEEHEPRQOPRPRQ        | 58  |
| sp F5B8W3 CONB5_LUPAN  | MAKMRVRFPMILLGVVFLLAASIGIAYGEKDVTKNPERPEERQEEDRPQPPRSRQ            | 60  |
| tr B0YJF7 B0YJF7_LUPAN | -----                                                              | 0   |
| sp F5B8W0 CONB2_LUPAN  | MANMRVKFPTLVLLLGIVFLMAVSIGIAYGEKNAIKNHERPQEREQEEDRPQOPRPRHQ        | 60  |
| sp F5B8W1 CONB3_LUPAN  | MAKMRVRFPTLVLLLGIVFLMAVSIGIAYGEKNVKNHERPQEREQEEDRPQOPRPHHQ         | 60  |
| sp F5B8W2 CONB4_LUPAN  | MIKMRVRFPTLVLLLGIVFLMAVSIGIAYGEKNVKNHERPQEREQEEDRPQOPRPHHQ         | 60  |
| tr B0YJF8 B0YJF8_LUPAN | EEQEREHRREEKHGDEPSRGRSQSEESQEEEHERRREHHREREQEOPRPRQROEEE----       | 115 |
| sp F5B8V9 CONB1_LUPAN  | EEQEREHRREEKHGDEPSRGRSQSEESQEEEHERRREHHREREQEOPRPRQROEEE----       | 115 |
| tr B8Q5G0 B8Q5G0_LUPAN | EEQEREHRREEKHGDEPSRGRSQSEESQEEEHERRREHHREREQEOPRPRQROEEE----       | 115 |
| sp F5B8W3 CONB5_LUPAN  | EEQEREHRREEKRDREPSRGRSESKQSEEEERRRKHDREREQEOPYGRHHEEEKG            | 120 |
| tr B0YJF7 B0YJF7_LUPAN | -----EERQEEERERRRPRCREREQEOPQHGRREE----                            | 33  |
| sp F5B8W0 CONB2_LUPAN  | EEQEREHGREERNRPSRGRSEESREEREORRPSRGREREQEOPQHGRREE----             | 115 |
| sp F5B8W1 CONB3_LUPAN  | EEQEREHRRES-----EESQEEEREORRPRREREQEOPQHGRREE----                  | 102 |
| sp F5B8W2 CONB4_LUPAN  | EEQEREHRREEEDRPSRGRSEESREEREORRPRREREQEOPQHGRREE----               | 115 |
|                        | :: :***:*:* * ***** *                                              |     |
| tr B0YJF8 B0YJF8_LUPAN | EEEEEWOPRRORPQSRREEREEREQEGSSSGSRGSGDERRH-----                     | 159 |
| sp F5B8V9 CONB1_LUPAN  | EEEEEWOPRRORPQSRREEREEREQEGSSSGSRGSGDERRH-----                     | 159 |
| tr B8Q5G0 B8Q5G0_LUPAN | EEEEEWOPRRORPQSRREEREEREQEGSSSGSRGSGDERRH-----                     | 159 |
| sp F5B8W3 CONB5_LUPAN  | EEEEEGQARRORPQRRREE---REQEQSSSESRRQSGDERRHREKREOREEREQEGS          | 177 |
| tr B0YJF7 B0YJF7_LUPAN | -----EEEEWOPRLLRPQSRKEE---REQEQSSSSSRKQSGYERRQY-----               | 73  |
| sp F5B8W0 CONB2_LUPAN  | -----EEEWOPRRORPQSRREE---REQEQSSSSSGRQSGYERRQ-----                 | 154 |
| sp F5B8W1 CONB3_LUPAN  | -----EEEEWOPRRORPQSRREE---REQEQSSSSSRQSGYERRQ-----                 | 141 |
| sp F5B8W2 CONB4_LUPAN  | -----EEEWOPRRORPQSRREE---REQEQSSSSSRQSGYERR-----                   | 153 |
|                        | *** * * * * * * * * * * * * * * * * * * * * * * * *                |     |
| tr B0YJF8 B0YJF8_LUPAN | -----RERRVHREEREQEODSRSDSRQRNPYHFSNRFQTYNRRNGQIRV                  | 206 |
| sp F5B8V9 CONB1_LUPAN  | -----RERRVHREEREQEODSRSDSRQRNPYHFSNRFQTYNRRNGQIRV                  | 206 |
| tr B8Q5G0 B8Q5G0_LUPAN | -----RERRVHREEREQEODSRSDSRQRNPYHFSNRFQTYNRRNGQIRV                  | 206 |
| sp F5B8W3 CONB5_LUPAN  | SSGRQSDYGRQRHGREOREEREQEQSSSESHRLNPNYFSSERFQTRYNNKNGQIRV           | 237 |
| tr B0YJF7 B0YJF7_LUPAN | -----HERREORDEKEQEODSRSDSRQRNPYHFSNRFQTRYNNKNGQIRV                 | 120 |
| sp F5B8W0 CONB2_LUPAN  | -----REEREQ---QOEQDSRSSESRQRNPYFYSERFQTRYNNKNGQIRV                 | 197 |
| sp F5B8W1 CONB3_LUPAN  | -----REEREQ---EQEGSRSDSRQRNPYFYSERFQTRYNNKNGQIRV                   | 184 |
| sp F5B8W2 CONB4_LUPAN  | -----EREQ---EQEGSRSDSRQRNPYFYSERFQTRYNNKNGQIRV                     | 194 |
|                        | * : :*:*,*:*:* * * * * * * * * * * * * * * * * * *                 |     |
| tr B0YJF8 B0YJF8_LUPAN | LERFNQRTNRLLENLQNYRIIEFQSKPNTLILPKHSDADFILVVLNGRATITIVNPKRQV       | 266 |
| sp F5B8V9 CONB1_LUPAN  | LERFNQRTNRLLENLQNYRIIEFQSKPNTLILPKHSDADFILVVLNGRATITIVNPKRQV       | 266 |
| tr B8Q5G0 B8Q5G0_LUPAN | LERFNQRTNRLLENLQNYRIIEFQSKPNTLILPKHSDADFILVVLNGRATITIVNPKRQV       | 266 |
| sp F5B8W3 CONB5_LUPAN  | LERFDQRTNRLLENLQNYRIVEFQSRPNTLILPKHSDADYILVVLNGRATITIVNPKRQA       | 297 |
| tr B0YJF7 B0YJF7_LUPAN | LERFDQRTNRLLENLQNYRIVEFQSNPNTLILPKHSDADYILVVLNGRATITIVNPKRQA       | 180 |
| sp F5B8W0 CONB2_LUPAN  | LERFDQRTNRLLENLQNYRIVEFQSKPNTLILPKHSDADYILVVLNGRATITIVNPKRQA       | 257 |
| sp F5B8W1 CONB3_LUPAN  | LERFDQRTNRLLENLQNYRIVEFQSKPNTLILPKHSDADYILVVLNGSATITIVNPKRQS       | 244 |
| sp F5B8W2 CONB4_LUPAN  | LERFDQRTNRLLENLQNYRIVEFQSKPNTLILPKHSDADYILVVLNGSATITIVNPKRQS       | 254 |
|                        | ***:***:*****:***:*****:*****:*****:*****:*****:*****              |     |
| tr B0YJF8 B0YJF8_LUPAN | YNLEQGDALRLPAGTTSYILNPDNDQNLRAKLAIPINNPGKLYDFPSTTKDQSQSYFSG        | 326 |
| sp F5B8V9 CONB1_LUPAN  | YNLEQGDALRLPAGTTSYILNPDNDQNLRAKLAIPINNPGKLYDFPSTTKDQSQSYFSG        | 326 |
| tr B8Q5G0 B8Q5G0_LUPAN | YNLEQGDALRLPAGTTSYILNPDNDQNLRAKLAIPINNPGKLYDFPSTTKDQSQSYFSG        | 326 |
| sp F5B8W3 CONB5_LUPAN  | YNLEYGDALRLPAGTTSYILNPDNDQNLRAKLAIPINNPGKLYDFPSTTKDQSQSYFSG        | 357 |
| tr B0YJF7 B0YJF7_LUPAN | YNLEYGDALRLPAGTTSYILNPDNDQNLRAKLAIPINNPGKLYDFPSTTKDQSQSYFSG        | 240 |
| sp F5B8W0 CONB2_LUPAN  | YNLEHGDALRLPAGTTSYILNPDNDQNLRAKLAIPINNPGKLYDFPSTTKDQSQSYFSG        | 317 |
| sp F5B8W1 CONB3_LUPAN  | YNLENGDALRLPAGTTSYILNPDNDQNLRAKLAIPINNPGKLYDFPSSSKDQSQSYFSG        | 304 |
| sp F5B8W2 CONB4_LUPAN  | YNLENGDALRLPAGTTSYILNPDNDQNLRAKLAIPINNPGKLYDFPSSSKDQSQSYFSG        | 314 |
|                        | *** *****:***:*****:***:*****:***:*****:***:*****:***:*****        |     |
| tr B0YJF8 B0YJF8_LUPAN | FSKNTLEATNTRYEEIERVLGDDDELQENKQRRGEQSHODEGVIVRVSKKQIQELRK          | 386 |
| sp F5B8V9 CONB1_LUPAN  | FSKNTLEATNTRYEEIERVLGDDDELQENKQRRGEQSHODEGVIVRVSKKQIQELRK          | 386 |
| tr B8Q5G0 B8Q5G0_LUPAN | FSKNTLEATNTRYEEIERVLGDDDELQENKQRRGEQSHODEGVIVRVSKKQIQELRK          | 386 |
| sp F5B8W3 CONB5_LUPAN  | FSKNTLEATNTRYEEIQRIILGDEDEQEEORRGEQSHODEGVIVRVSKQIQELRK            | 417 |
| tr B0YJF7 B0YJF7_LUPAN | FSKNTLEATNTRYEEIQRIILGDEDEQEEORRGEQSHODEGVIVRVSKQIQELRK            | 300 |
| sp F5B8W0 CONB2_LUPAN  | FSRNTLEATNTRYEEIQRIILGDEDEQEEORRGEQSHODEGVIVRVSKQIQELRK            | 377 |
| sp F5B8W1 CONB3_LUPAN  | FSKNTLEATNTRYEEIQRIILGDEDEQEEORRGEQSHODEGVIVRVSKQIQELRK            | 364 |
| sp F5B8W2 CONB4_LUPAN  | FSRNTLEATNTRYEEIQRIILGDEDEQEEORRGEQSHODEGVIVRVSKQIQELRK            | 374 |
|                        | **:*:*:*:*:*:*:*:*:*:*:*:*:*:*:*:*:*:*:*:*:*:*:*:*:*:*:*:*:*:*:*:* |     |
| tr B0YJF8 B0YJF8_LUPAN | HAQSSSGEGKPSSEGPFLRSNKPITYSNKFGNFYEITPDINPQFQDLNISLTFTEINELW       | 446 |
| sp F5B8V9 CONB1_LUPAN  | HAQSSSGEGKPSSEGPFLRSNKPITYSNKFGNFYEITPDINPQFQDLNISLTFTEINELW       | 446 |
| tr B8Q5G0 B8Q5G0_LUPAN | HAQSSSGEGKPSSEGPFLRSNKPITYSNKFGNFYEITPDINPQFQDLNISLTFTEINELW       | 446 |
| sp F5B8W3 CONB5_LUPAN  | HAQSSSRKGPSESGPFLRSNKPITYSNKFGNFYEITPDINPQFQDLNISLTFTEINELW        | 477 |
| tr B0YJF7 B0YJF7_LUPAN | HAQSSSRKGPSESGPFLRSNKPITYSNKFGNFYEITPDINPQFQDLNISLTFTEINELW        | 360 |
| sp F5B8W0 CONB2_LUPAN  | HAQSSSGKGPSESGPFLRSNKPITYSNKFGNFYEITPDINPQFQDLNISLTFTEINELW        | 437 |
| sp F5B8W1 CONB3_LUPAN  | YAQSSSRKGPSESGPFLRSNKPITYSNKFGNFYEITPDINPQFQDLNISLTFTEINELW        | 424 |
| sp F5B8W2 CONB4_LUPAN  | YAQSSSRKGPSESGPFLRSNKPITYSNKFGNFYEITPDINPQFQDLNISLTFTEINELW        | 434 |
|                        | :***** :*** :*****: *****:*** ***:*** * **:                        |     |
| tr B0YJF8 B0YJF8_LUPAN | LTKEKE---IMN-----                                                  | 455 |
| sp F5B8V9 CONB1_LUPAN  | LLLPHYNSKAIPIVVVDEGEQNYELVGIRDQRRQDEQEEEYEQGEVEVRRYSKLSKGD         | 506 |
| tr B8Q5G0 B8Q5G0_LUPAN | LLLPHYNSKAIPIVVVDEGEQNYELVGIRDQRRQDEQEEEYEQGEVEVRRYSKLSKGD         | 506 |
| sp F5B8W3 CONB5_LUPAN  | LLLPHYNSKAIPIVVVDEGEQNYELVGIRNQRRQDEQE-----VEEVRRYSARLSEGD         | 531 |
| tr B0YJF7 B0YJF7_LUPAN | LLLPHYNSKAIPIVVVDEGEQNYELVGIRDQRRQDEQE-----VEEVRRYSARLSEGD         | 416 |
| sp F5B8W0 CONB2_LUPAN  | LLLPHYNSKAIPIVVVDEGEQNYELVGIRDQRRQDEQE-----QEEVRRYSARLSEGD         | 491 |
| sp F5B8W1 CONB3_LUPAN  | LLLPHYNSKAIPIVVVDEGEQNYELVGIRDQRRQDEQE-----EVRRYSARLSEGD           | 475 |
| sp F5B8W2 CONB4_LUPAN  | LLLPHYNSKAIPIVVVDEGEQNYELVGIRDQRRQDEQE-----EVRRYSARLSEGD           | 485 |
|                        | * : *                                                              |     |
| tr B0YJF8 B0YJF8_LUPAN | VFIIIPAGHPLSINASSNRLLLGFGINANENQORNFLAGSEDNVIKQLDREVKELTFPGSIE     | 455 |
| sp F5B8V9 CONB1_LUPAN  | VFIIIPAGHPLSINASSNRLLLGFGINANENQORNFLAGSEDNVIKQLDREVKELTFPGSIE     | 566 |
| tr B8Q5G0 B8Q5G0_LUPAN | VFIIIPAGHPLSINASSNRLLLGFGINANENQORNFLAGSEDNVIKQLDREVKELTFPGSIE     | 566 |
| sp F5B8W3 CONB5_LUPAN  | ILVIPAGHPLSINASSNRLLLGFGINADENQORNFLAGSEDNVIRQLDREVKELTFPGSAE      | 591 |
| tr B0YJF7 B0YJF7_LUPAN | IFVIPAGHPLSINASSNRLLLGFGINANENQORNFLAGSEDNVISQLDREVKELTFPGSAE      | 476 |
| sp F5B8W0 CONB2_LUPAN  | IFVIPAGHPLSINASSNRLLLGFGINADENQORNFLAGSEDNVIRQLDREVKELTFPGSAE      | 551 |
| sp F5B8W1 CONB3_LUPAN  | IFVIPAGHPLSINASSNRLLLGFGINADENQORNFLAGSEDNVIRQLDREVKELTFPGSAE      | 535 |
| sp F5B8W2 CONB4_LUPAN  | IFVIPAGHPLSINASSNRLLLGFGINADENQORNFLAGSEDNVIRQLDREVKELTFPGSTE      | 545 |
| tr B0YJF8 B0YJF8_LUPAN | -----                                                              | 455 |
| sp F5B8V9 CONB1_LUPAN  | DVERLIKNOQSSYFANAQPQ00-QOREKEGRRGRGPISILLNALLY-----                | 611 |
| tr B8Q5G0 B8Q5G0_LUPAN | DVERLIKNOQSSYFANAQPQ00-QOREKEGRRGRGPISILLNALLY-----                | 611 |
| sp F5B8W3 CONB5_LUPAN  | DVERLIRNOQSSYFANAQPQ00QOREKEGRRGRGPISILLNALLY-----                 | 637 |
| tr B0YJF7 B0YJF7_LUPAN | DVERLIKNOQSSYFANAQPQ0K-QOREKEGRRGRRLSILLSTLY-----Y                 | 521 |
| sp F5B8W0 CONB2_LUPAN  | DVERLIKNOQSSYFANAQPQ00-QOREKEGRRGRRLSPFRSLFTKLLSTIM                | 603 |
| sp F5B8W1 CONB3_LUPAN  | DVERLIKNOQSSYFANAQPQ00-QOREKEGRRGRRLSILLSTLY-----                  | 580 |
| sp F5B8W2 CONB4_LUPAN  | DVERLIKNOQSSYFANAQPQ00-QOREKEGRRGRRLSILLSTLY-----                  | 590 |

**Figure S7.** Sequence alignment of  $\beta$ -globulin proteins B0YJF7, B0YJF8, F5B8W0, F5B8W1, F5B8W2, F5B8W3, F5B8V9 and B8Q5G0.

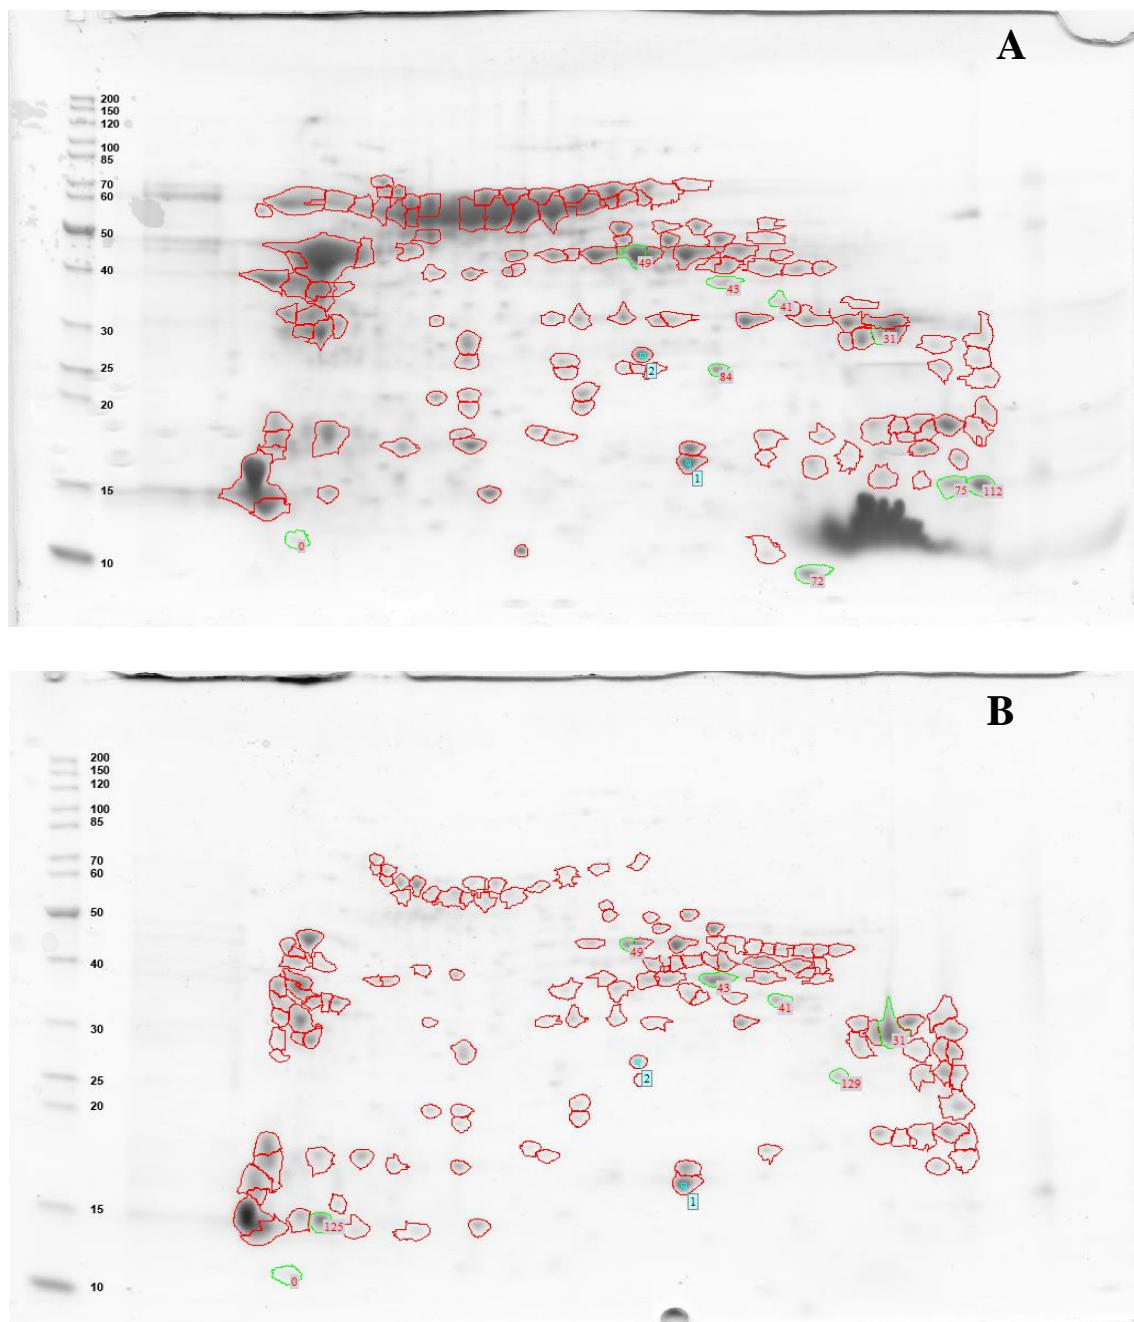

**Figure S8.** 2D gel map comparison of Modica Ecotype (A) and Luxor cultivar (B). Excised spots are highlighted in green. The corresponding identifications are reported in **Tables S2 – 4**, where spot ID are reported with an asterisk (\*).



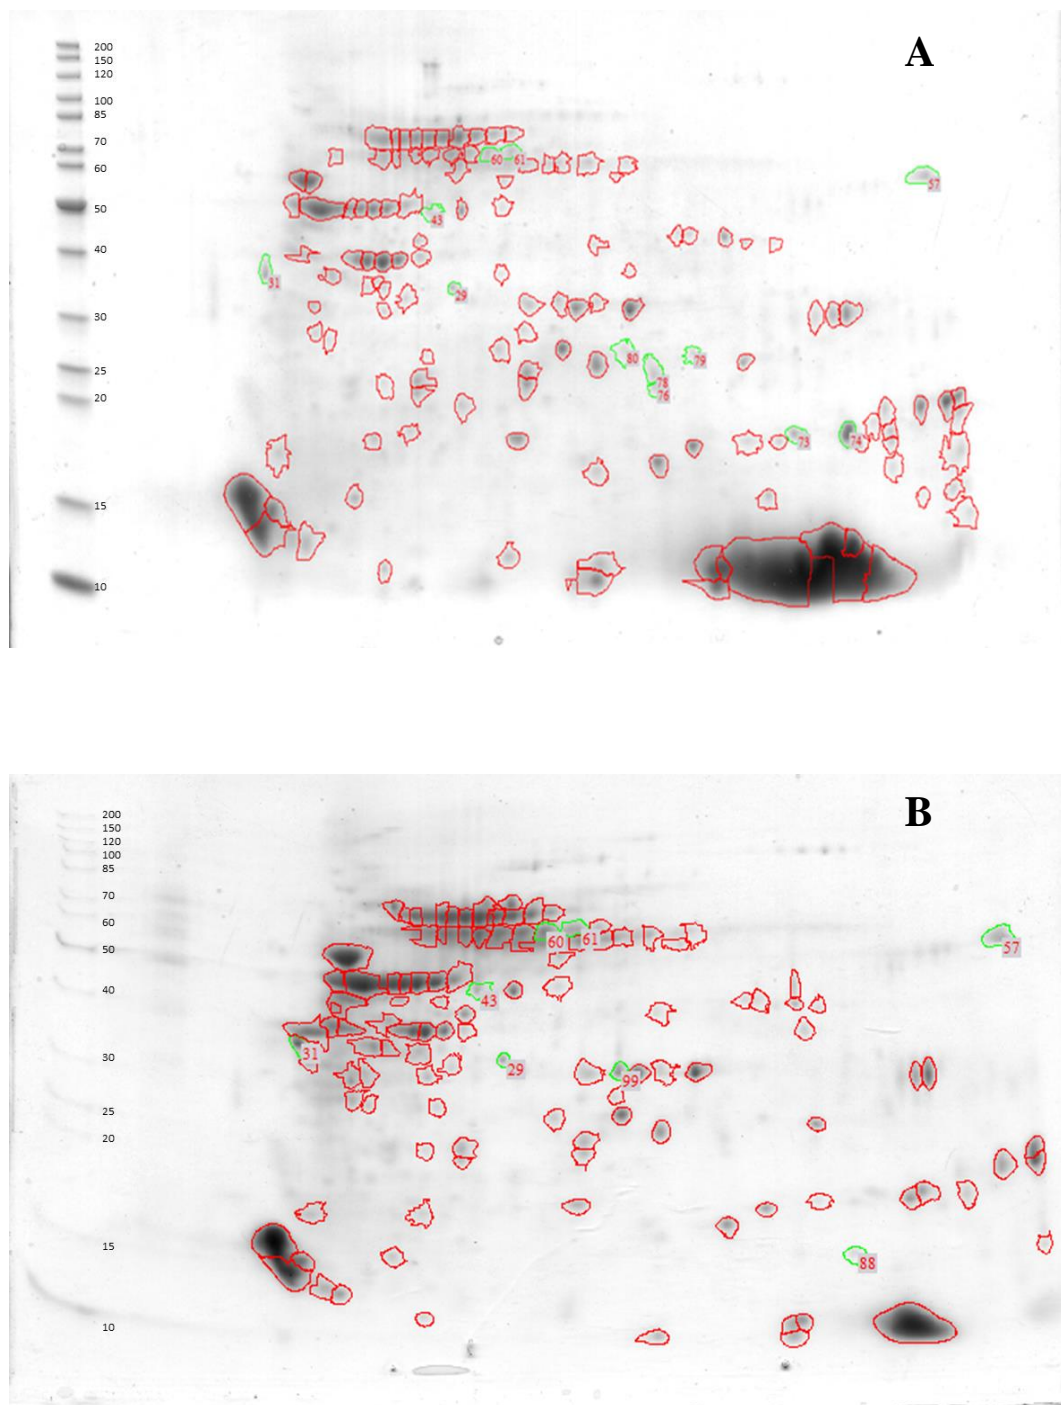

**Figure S9.** 2D gel map comparison of Taper (A) and Dukat cultivar (B). Excised spots are highlighted in green. The corresponding identifications are reported in **Tables S5 – 6**, where spot ID are reported with an asterisk (\*).

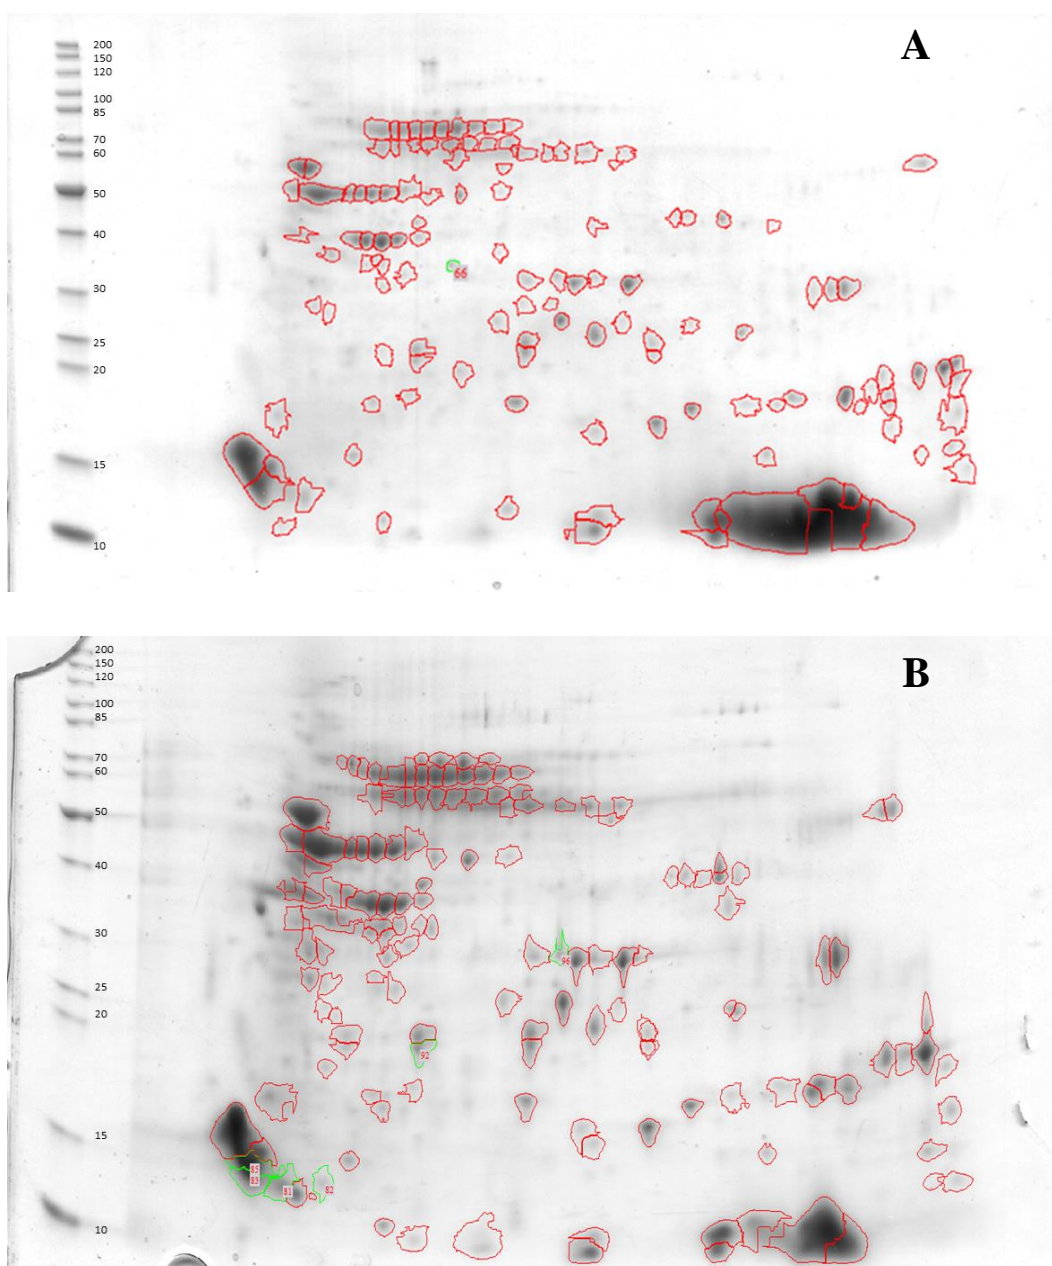

**Figure S10.** 2D gel map comparison of cv Taper (A) cv Mister (B). Excised spots are highlighted in green. The corresponding identifications are reported in **Tables S7 - 8**, where spot ID are reported with an asterisk (\*).
